# Supplementary material
Source: PubMed Central journal article supplement (PMC8000424)
Supplement: pnas.2022598118.sapp.pdf [file pnas.2022598118.sapp.pdf]

1

## 2 **Supplementary Information for**

3 **The effective graph reveals redundancy, canalization, and control pathways in biochemical**  
4 **regulation and signaling**

5 **Alexander J. Gates, Rion Brattig Correia, Xuan Wang, and Luis M. Rocha**

6 **Alexander J. Gates and Luis M. Rocha.**

7 **E-mails: [a.agates@northeastern.edu](mailto:a.agates@northeastern.edu) and [rocha@indiana.edu](mailto:rocha@indiana.edu)**

### 8 **This PDF file includes:**

9     Supplementary text

10    Figs. S1 to S24

11    Tables S1 to S7

12    References for SI reference citations

## 13 Supporting Information Text

### 14 1. Schema Redescription Theory

15 **A. Boolean minimization and prime implicants.** The minimization of Boolean functions is a well known problem in electrical  
16 engineering and computer science. In both fields, the goal is typically to reduce the components and complexity needed to  
17 implement Boolean logic in electronic circuitry by removing redundancy from the computation of multivariate logical functions.  
18 The Quine-McCluskey algorithm (Q-M) is one of the best-known methods to remove the redundancy from logical functions  
19 (1, 2). Boolean minimization in the Q-M algorithm is achieved by uncovering the *prime implicants* (PI) of a Boolean function,  
20 i.e. an implication that resolves the logical value of the function (output) utilizing the least number of input variable states (or  
21 literals) possible. PI are thus minimal conditions (a conjunction of literals) to achieve automata state transition—minimal in  
22 the sense that the removal of any literal from the implication results in not knowing the output state (1). The first step of  
23 Q-M yields the set of all PI, or the *Blake Canonical Form* of a Boolean function—a disjunctive normal form of all PI. In our  
24 method, we represent PI by wildcard schemata, and the set of schemata that redescribe the automaton is a disjunction of all  
25 PI, equivalent to its Blake Canonical Form(3).

26 In the standard application of Q-M for Boolean minimization, the set of all PI is further reduced to uncover the *essential*  
27 *prime implicants*, which are PI that cover at least an entry of the LUT that cannot be covered by a combination of other PI.  
28 These essential PI are always needed to minimize a Boolean function. In contrast, redundant PI cover LUT entries that are  
29 already covered by a combination of essential PI. Finally, selective PI are neither essential nor redundant, and are selected at  
30 the end of Q-M to ensure coverage of all entries of the LUT. In the typical application of Boolean minimization, all redundant  
31 PI are removed and the final form of the Boolean function is a disjunction of all essential PI, plus selected PI needed to cover  
32 the entire LUT—selective PI are chosen to minimize the number of literals (maximizing wildcards).

33 In contrast to the engineering view of Boolean minimization, we are interested in characterizing the redundancy present in  
34 all possible interventions, even if some of those interventions can be built by combinations of other interventions. Therefore, we  
35 keep the entire set of PI, or the full Blake canonical form in schemata form. This allows us to preserve all possible *mechanisms*  
36 that change dynamical state in automata and are thus, in principle, amenable to control or perturbation interventions. In this  
37 sense, our goal is distinct from Boolean minimization of circuit design where the focus is on guaranteeing correct function  
38 computation with the least amount of wiring: to remove all redundancy in the computation of the full function. See (3) for  
39 additional details, including why the set of all PI is also necessary to infer symmetry constraints in schemata.

To appreciate why it is important to use all PI in the computation our proposed measures, consider the following example  
LUT of a Boolean function of  $k = 3$  inputs  $f(x_1, x_2, x_3)$ :

```
000 → 0
001 → 0
010 → 1
011 → 0
100 → 0
101 → 1
110 → 1
111 → 1
```

Its schema redescription, or Blake canonical form with all PI is:

```
00# → 0
0#1 → 0
#00 → 0
#10 → 1
1#1 → 1
11# → 1
```

40 where the essential PI are shown in bold, with corresponding unique LUT entries also shown in bold in LUT. Note that a PI is  
41 essential if it redescribes at least one LUT entry that is not redescribed by any other PI (e.g.  $010 \rightarrow 1$  is only redescribed by  
42  $\#10 \rightarrow 1$ ). From this redescription, the measures from main text eqs. 3-5 yield:  $r_1 = r_2 = 3/8, r_3 = 1/4, e_1 = e_2 = 5/8, e_3 =$   
43  $3/4, a_1 = a_2 = a_3 = 1/2$ . If we considered the full Boolean minimization process, we would use (in this case) only the essential  
44 PI shown in bold, yielding:  $r_1 = r_2 = 1/2, r_3 = 0, e_1 = e_2 = 1/2, e_3 = 1, a_1 = a_2 = 1/2, a_3 = 1$ . Notably, using only the  
45 essential PI would lead to incorrect inferences about the result of possible interventions. First, the effectiveness of input  $x_3$   
46 would be inferred as maximal (1), when the non-essential PI  $00\# \rightarrow 0$  and  $11\# \rightarrow 1$  show that in reality it is possible to  
47 determine the state of  $f$  not knowing the state of  $x_3$ , or conversely, to control  $f$  with  $x_1$  and  $x_2$  alone (collective canalization).  
48 This can also be seen in traditional logical form; the minimized expression is  $f = (x_2 \wedge \neg x_3) \vee (x_1 \wedge x_3)$ , whereas adding the  
49 non-essential PI yields  $f = (x_2 \wedge \neg x_3) \vee (x_1 \wedge x_3) \vee (x_1 \wedge x_2)$  (showing an extra term without  $x_3$ .)

Our analysis with all PI reveals the fact that while  $x_3$  is more effective in determining the state of  $f$  ( $e_3 > e_1 = e_2$ ), it has some redundancy ( $r_3 = 1/4$ ) and is therefore not fully effective ( $e_3 = 3/4$ ). Moreover, our formula (eq. 5 in main text) for deriving activity is only accurate when using all PI (see proof below). Indeed, the correct activity for input  $x_3$  in this automaton is  $a_3 = 1/2$  (only half the time this input changes its state leads  $f$  to change its output), not  $a_3 = 1$  as using only the essential PI would have us infer. This example demonstrates that if our goal is to study which minimal interventions lead to state changes (rather than minimizing Boolean functions), we must include all PI in schema redescription.

Finally, this example also serves to highlight the difference between edge effectiveness and activity. While the latter does not distinguish the role of the three inputs ( $a_1 = a_2 = a_3 = 1/2$ ), the former characterizes input  $x_3$  as a little more effective at changing the state of  $f$  than inputs  $x_1$  and  $x_2$  ( $e_1 = e_2 = 5/8, e_3 = 3/4$ .) Indeed, this is the only input that does not appear as wildcard in any of the essential PI (appears always as literal), thus it is a little more effective (less redundant) than the other too. Our measures distinguish this behavior because the LUT entries (000, 001, 110, and 111) redescrbed by the non-essential schemata/PI with wildcards in the  $x_3$  position (00# and 11#), can also be redescrbed by essential PI which have no wildcards in the  $x_3$  position (#00, 0#1, #10, and 1#1), and all other LUT entries are redescrbed by schemata that also do not have wildcards in the  $x_3$  position. In contrast, in the case of input variables  $x_1$  and  $x_2$ , there are two (our of eight) LUT entries for each than can only be redescrbed by essential PI/schemata that have wildcards in the  $x_1$  or  $x_2$  positions: 010 and 100 redescrbed by #10 and #00 for  $x_1$ , and 011 and 101 redescrbed by 0#1 and 1#1 for  $x_2$ , respectively. In summary, there are more possibilities (PI) to intervene on the state of function  $f$  that must include  $x_3$  than is the case for the other two inputs, which are thus a little more redundant as measured by our collective canalization measures, but not by activity. Naturally, the node-level measures of collective canalization (eqs. 1-2 in main text) also paint a more accurate description of redundancy than sensitivity:  $k_r(f) = 1, k_e(f) = 2, s(f) = 3/2$ . As can be seen by the PI/schemata, one always needs two inputs to determine the state of  $f$ , so only one is redundant on average and the effective connectivity of the automaton is two inputs on average. In contrast, because it does not account for collective canalization ( $k_e(f) = 1/2$ ), sensitivity posits that  $f$  is sensitive to only 1.5 inputs.

**B. Aggregation of prime implicant influence.** The per-node and per-edge measures of redundancy given by eqs 1 and 3 in main paper, aggregate the redundancy of PI/schemata that redescrbe each entry of a LUT for the entire function or per input, respectively. The idea is to tally the redundancy of inputs of an automaton as conveyed by every PI/schema (as a possible intervention strategy). In the analysis pursued here, the aggregation is computed via the average operator (avg). This is the same as assuming that any PI/schema is a viable intervention possibility to change the state of automaton  $x$ . In (3) it was shown that the aggregation for input redundancy is bound by using minimum and maximum operators. The lower (upper) bound, obtained by substituting min (max) for avg in eq. 1, assumes that the schema that bests redescrbes a given LUT entry is the one with least (most) number of wildcards.

Because we have no reason to prioritize a PI/schema over another one that redescrbes the same LUT entry, we use the average operator, thus assuming that all PI are equally likely and important—as shown above, it is important to consider the influence of all PI as possible interventions. Moreover, averaging over all possible schemata, allows the additive per-edge separation of redundancy necessary for the effective graph (eqs. 3-4), whereby  $k_r(x_i) = \text{SUM}_j r_{ji}$  and  $k_e(x_i) = \text{SUM}_j e_{ji}$ , as well as the clear relationship with activity and sensitivity (see proof below). One could consider a general case where a probability or weighting of each PI is considered, e.g. assigning greater importance to essential PI, but at this point no advantage to pursuing such a route was identified. The CANA package (4) defaults to calculating input redundancy and effective connectivity using the average operator, but has the available functionality to use their lower or upper bounds as well.

**C. Activity and sensitivity via prime implicants.** Here we show that the activity of input  $x_j$  to automaton  $x_i$  can be defined in terms of the schema redescription (the set of all PI) of  $x_i$  by eq. 5 in main text with the max operator in place of the average operator (as used for edge effectiveness in eq. 3 in main text). To see this, let us review the definition of activity (5):  $a_j(x_i) = P(\overline{x_i^{t+1}} | x_j^t)$ , which is the probability that automaton  $x_i$  flips its state at  $t + 1$  when its input  $x_j$  flips its state at  $t$ , given a uniform distribution of input states at  $t$ . To compute the activity from the LUT of  $x_i$  we consider that for every entry  $f_\alpha$  in the LUT  $F_i$ , if flipping the state of input  $x_j$  (flipping the  $j$ th bit) leads  $x_i$  to change its state output, then that entry will add  $1/|F_i| = 1/2^k$  to the activity. Summing over all LUT entries we have (5):

$$a_j(x_i) = \frac{1}{2^k} \sum_{f_\alpha \in F_i} \frac{\partial f_\alpha}{\partial x_j} \quad [1]$$

where  $\partial f_\alpha / \partial x_j = 1$  if flipping the  $j$ th bit of  $f_\alpha$  changes  $x_i$ , and 0 otherwise.

**Theorem 1.**

$$a_j(x_i) = \frac{1}{|F_i|} \sum_{f_\alpha \in F_i} \frac{\partial f_\alpha}{\partial x_j} = \frac{1}{|F_i|} \sum_{f_\alpha \in F_i} \left( 1 - \max_{v: f_\alpha \in \Upsilon_v^i} (j \mapsto \#)_v \right) = 1 - \frac{1}{|F_i|} \sum_{f_\alpha \in F_i} \max_{v: f_\alpha \in \Upsilon_v^i} (j \mapsto \#)_v \quad [2]$$

where  $(j \mapsto \#)_v$  is a logical condition that is 1 / True if input  $x_j$  is a wildcard in schema  $f'_v$ , and 0 / False otherwise.

**Proof.** To prove the equality of equation 2, we have to show that:

$$\frac{\partial f_\alpha}{\partial x_j} = 1 - \max_{v: f_\alpha \in \Upsilon_v^i} (j \succ \#)_v \quad [3]$$

which can be rephrased as an existence statement:

$$\frac{\partial f_\alpha}{\partial x_j} = 0 \iff \exists v: f_\alpha \in \Upsilon_v^i \wedge (j \succ \#)_v, \quad f_\alpha \in F_i. \quad [4]$$

In other words, LUT entry  $f_\alpha \in F_i$  contributes 0 to  $a_{ji}$  if and only if it is redescribed by at least one schema  $f'_v$  with a wildcard in its  $x_j$  position. Rephrased in terms of the PI, we have that LUT entry  $f_\alpha \in F_i$  contributes 0 to  $a_{ji}$  if and only if it is covered by at least one PI with no literals for the  $x_j$  logical variable.

Proving this statement, requires us to prove 3 simple lemmas.

**Lemma 1:** If LUT entry  $f_\alpha \in F_i$  is redescribed by at least one schema/PI  $f'_v$  with a wildcard in its  $x_j$  position, it will contribute 0 to activity ( $\partial f_\alpha / \partial x_j = 0$ ).

The proof of the lemma follows from the definition of partial derivative of an automaton (eq. 7 in main text). Assume that schema/PI  $f'_v$  redescribes  $f_\alpha \in F_i$  and has a wildcard in its  $x_j$  position. Then the state of  $x_j$  does not influence the configuration of literals (other inputs)  $f'_v$  specifies and cannot contribute to changing the state of  $x_i$ .

**Lemma 2,** the converse proposition of Lemma 1: if LUT entry  $f_\alpha \in F_i$  contributes 0 to the activity of input  $x_j$  to automaton  $x_i$  ( $\partial f_\alpha / \partial x_j = 0$ ), then there must exist at least one schema/PI of  $x_i$ ,  $f'_v \in F'_i$ , which redescribes  $f_\alpha$  and has a wildcard in its  $x_j$  position, that is,  $f_\alpha \in \Upsilon_v^i$ .

For an LUT entry  $f_\alpha = s_1 \dots s_j \dots s_k$  to have  $\partial f_\alpha / \partial x_j = 0$ , then we must have  $(s_1 \dots 0 \dots s_k \rightarrow s) \wedge (s_1 \dots 1 \dots s_k \rightarrow s)$ , which is equivalent to  $(s_1 \dots \# \dots s_k \rightarrow s)$ , where  $s$  is any truth value (or literal for the input variables). Though the implicant  $(s_1 \dots \# \dots s_k \rightarrow s)$  might not be a PI itself, Lemma 3 below says there must be a schema/PI with a wildcard in position  $x_j$ .

**Lemma 3:** if LUT entry  $f_\alpha \in F_i$  can be covered by an implicant with a wildcard in its  $x_j$  position, then there must be at least one schema/PI having a wildcard in its  $x_j$  position.

This is straightforward considering the definition of prime implicant. Merging this implicant with other implicants to create a prime implicant will only add new wildcards without removing any existing wildcard. If the implicant cannot be covered by any prime implicant, then it is itself a prime implicant.

Combining all three lemmas, we prove our theorem.

The reader can notice that lemma 3 is contingent on using all possible PI. If only essential PIs were used, lemma 3 will not hold true as the example LUT in A shows.

## 2. Systems Biology Models

**A. Cell Collective Data set.** All experimentally-validated biochemical regulation and signalling BN models were retrieved from the Cell Collective (6) as of Aug 5<sup>th</sup> 2020 or were retrieved from literature and implemented in CANA(4). Table S1 shows the complete list of BN, including their respective Cell Collective and PubMed identifiers.

Note that two of the BN studied here contain a Boolean automata that is a full contradiction. That is, the Boolean automata is constant and does not depend on any of its inputs, despite having 4 or 8 specified inputs in its logical transition function. The presence of such logic irregularities further emphasizes the need for the effective connectivity methods presented here.

**B. Existence of Fully Redundant Interactions.** We found that 17 of the Cell Collective models (22%) contained at least one fully redundant edge, with 87 fully redundant edges in total. One possible explanation for the prevalence of fully redundant edges in gene regulatory or protein-interaction networks is that these models are often inferred from experimental data via information-theoretic measures, e.g. mutual information or transfer entropy (69), that can fail to discriminate between dyadic and polyadic relationships (70), and can thus miss the true multivariate dependency structure. But perhaps the main reasons are: 1) an incomplete record of experimental observation, 2) integration of experimental studies conducted by many different teams in different scenarios, and 3) modeling decisions about conflicting or weak evidence. This is especially problematic when the number of possible input combinations ( $k$ ) is large and experimentally testing all possible control conditions becomes unfeasible. Thus, fully redundant edges may be included because they refer to interactions that were not fully observed. Moreover, interactions observed in a given experimental setup may be subsequently rendered redundant when considering additional experimental controls or different thresholds for interaction significance; the reverse is also possible, whereby a redundant interaction is subsequently considered necessary with additional experimental evidence or change in criterion for strength of interaction.

This can be appreciated using the example in Figure 1 in main text. Let us imagine that it is assembled by integrating distinct interaction inference studies. Suppose that it describes how genes  $x_1, x_2$ , and  $x_3$  regulate the expression of gene  $x_4$ . Imagine that one interaction study does not include the effect of  $x_3$ , revealing a rather strong interaction relationship:  $x_4 = x_1 \wedge x_2$ . A separate study, on the other hand, does not control for the effect of  $x_1$ , observing not as clear an interaction effect of  $x_2$  and  $x_3$  on  $x_4$ . The study may reveal unequivocally that  $x_2 = 0 \Rightarrow x_4 = 0$  (per LUT entries  $f_1, f_2, f_5$  and  $f_6$  in Figure 1 in main text). But because  $x_1$  is not controlled in the study, correlational inference (e.g. via information-theoretical measures (69)) is more uncertain as to how the expression of  $x_2$  and  $x_3$  affect the expression of  $x_4$ . It could be that  $x_1$  was

**Table S1. The 78 Boolean network models used in the analysis. Network names appear *ipsis litteris* for BN obtained from the Cell Collective.**

|    | Network                                                         | Cell col. ID | PMID     | Ref    |
|----|-----------------------------------------------------------------|--------------|----------|--------|
| 1  | Thaliana flower development                                     | -            | 15486106 | (7, 8) |
| 2  | budding yeast cell cycle                                        | -            | 15037758 | (9)    |
| 3  | ER+ breast cancer signal transduction                           | -            | 29623959 | (10)   |
| 4  | Signal Transduction in Fibroblasts                              | 1557         | 18250321 | (11)   |
| 5  | Signaling in Macrophage Activation                              | 1582         | 18433497 | (12)   |
| 6  | Mammalian Cell Cycle                                            | 1607         | 19118495 | (13)   |
| 7  | FA BRCA pathway                                                 | 1778         | 22267503 | (14)   |
| 8  | HGF Signaling in Keratinocytes                                  | 1969         | 22962472 | (15)   |
| 9  | Cortical Area Development                                       | 2035         | 20862356 | (16)   |
| 10 | Death Receptor Signaling                                        | 2084         | 20221256 | (17)   |
| 11 | Yeast Apoptosis                                                 | 2135         | 23233838 | (18)   |
| 12 | Cardiac development                                             | 2136         | 23056457 | (19)   |
| 13 | Guard Cell Abscisic Acid Signaling                              | 2161         | 16968132 | (20)   |
| 14 | T Cell Receptor Signaling                                       | 2171         | 17722974 | (21)   |
| 15 | Cholesterol Regulatory Pathway                                  | 2172         | 19025648 | (22)   |
| 16 | T-LGL Survival Network 2008                                     | 2176         | 18852469 | (23)   |
| 17 | Neurotransmitter Signaling Pathway                              | 2202         | 17010384 | (24)   |
| 18 | IL-1 Signaling                                                  | 2214         | 21968890 | (25)   |
| 19 | Differentiation of T lymphocytes                                | 2215         | 23743337 | (26)   |
| 20 | EGFR & ErbB Signaling                                           | 2309         | 19662154 | (27)   |
| 21 | IL-6 Signalling                                                 | 2314         | 21968890 | (25)   |
| 22 | Apoptosis Network                                               | 2329         | 19422837 | (28)   |
| 23 | Body Segmentation in Drosophila 2013 (We uploaded this)         | 2341         | 23520449 | (3)    |
| 24 | B cell differentiation                                          | 2394         | 26751566 | (29)   |
| 25 | Mammalian Cell Cycle 2006                                       | 2396         | 16873462 | (30)   |
| 26 | Budding Yeast Cell Cycle                                        | 2404         | 23049686 | (31)   |
| 27 | T-LGL Survival Network 2011                                     | 2407         | 22102804 | (32)   |
| 28 | Budding Yeast Cell Cycle 2009                                   | 2423         | 19185585 | (33)   |
| 29 | Wg Pathway of Drosophila Signalling Pathways                    | 2663         | 23868318 | (34)   |
| 30 | VEGF Pathway of Drosophila Signaling Pathway                    | 2667         | 23868318 | (34)   |
| 31 | Toll Pathway of Drosophila Signaling Pathway                    | 2668         | 23868318 | (34)   |
| 32 | Processing of Spz Network from the Drosophila Signaling Pathway | 2669         | 23868318 | (34)   |
| 33 | Cell Cycle Transcription by Coupled CDK and Network Oscillators | 2681         | 18463633 | (35)   |
| 34 | T-Cell Signaling 2006                                           | 2691         | 16464248 | (36)   |
| 35 | BT474 Breast Cell Line Long-term ErbB Network                   | 2697         | 24970389 | (37)   |
| 36 | HCC1954 Breast Cell Line Long-term ErbB Network                 | 2698         | 24970389 | (37)   |
| 37 | BT474 Breast Cell Line Short-term ErbB Network                  | 2699         | 24970389 | (37)   |
| 38 | HCC1954 Breast Cell Line Short-term ErbB Network                | 2700         | 24970389 | (37)   |
| 39 | SKBR3 Breast Cell Line Short-term ErbB Network                  | 2701         | 24970389 | (37)   |
| 40 | SKBR3 Breast Cell Line Long-term ErbB Network                   | 2703         | 24970389 | (37)   |
| 41 | HIV-1 interactions with T Cell Signalling Pathway               | 2738         | 25431332 | (38)   |
| 42 | T cell differentiation                                          | 2901         | 16542429 | (39)   |
| 43 | Influenza A Virus Replication Cycle                             | 3481         | 23081726 | (40)   |
| 44 | TOL Regulatory Network                                          | 3491         | 23171249 | (41)   |

*Continues on the next page*

(unknowingly) more frequently expressed when testing condition  $x_2 = x_3 = 1$  (matching  $f_8$  more often than  $f_4$ ), but was more frequently inhibited when testing condition  $x_2 = 1 \wedge x_3 = 0$  (matching  $f_3$  more often than  $f_7$ ). This would lead the study to conclude that the most likely interaction is represented by  $x_4 = x_2 \wedge x_3$ , though with an observed weak effect due to how frequently  $x_1$  was expressed or not in the study for each condition. The weak effect would likely be reported and attributed to unknown causes of the expression of gene  $x_4$ —since  $x_1$  was not controlled in this second hypothetical study.

When systems biologists synthesize both studies into a network model, such as that of in Figure 1 in main text, decisions must be made. They may consider that the correct relationship is  $x_4 = (x_1 \wedge x_2) \vee (x_2 \wedge x_3)$ —This would result in the same LUT as Figure 1 in main text, except  $f_4 \equiv 011 : 1$ . But because the reported effect of the second experiment (second term) is much weaker than the observed effect in the first experiment (first term), the modelers may opt to characterize the synthesis of both experiments as  $x_4 = (x_1 \wedge x_2) \vee (x_1 \wedge x_2 \wedge x_3)$ , assuming that the observed unknown factor in the second experiment is  $x_1$  which was tested in the first experiment—because they have no evidence of any other genes being involved in the expression of  $x_4$ . This decision would lead to the example in Figure 1 in main text, which by associativity and absorption is simply  $x_4 = x_1 \wedge x_2$ , rendering  $x_3$  a redundant input.

A scenario that leads to a similar result is imagining a experimental study that does control for all three input genes, but

Table S1 - Continued from previous page

|    | Network                                                                         | Cell col. ID | PMID     | Ref  |
|----|---------------------------------------------------------------------------------|--------------|----------|------|
| 45 | Bordetella bronchiseptica                                                       | 3492         | 22253585 | (42) |
| 46 | Trichostrongylus retortaeformis                                                 | 3493         | 22253585 | (42) |
| 47 | HH Pathway of Drosophila Signaling Pathways                                     | 3506         | 23868318 | (34) |
| 48 | B bronchiseptica and T retortaeformis coinfection                               | 3509         | 22253585 | (42) |
| 49 | FGF pathway of Drosophila Signalling Pathways                                   | 3510         | 23868318 | (34) |
| 50 | Glucose Repression Signaling 2009                                               | 3511         | 19144179 | (43) |
| 51 | Oxidative Stress Pathway                                                        | 3512         | 23134720 | (44) |
| 52 | CD4 T cell signaling                                                            | 3521         | 25538703 | (45) |
| 53 | Colitis-associated colon cancer                                                 | 4601         | 26446703 | (46) |
| 54 | Septation Initiation Network                                                    | 4705         | 26244885 | (47) |
| 55 | Predicting Variabilities in Cardiac Gene                                        | 4706         | 26207376 | (48) |
| 56 | PC12 Cell Differentiation                                                       | 4775         | 27148350 | (49) |
| 57 | Human Gonadal Sex Determination                                                 | 4779         | 26573569 | (50) |
| 58 | IGVH mutations in chronic lymphocytic leukemia.                                 | 4783         | 26088082 | (51) |
| 59 | Fanconi anemia and checkpoint recovery                                          | 4790         | 26385365 | (52) |
| 60 | Arabidopsis thaliana Cell Cycle                                                 | 4837         | 26340681 | (53) |
| 61 | Bortezomib Responses in U266 Human Myeloma Cells                                | 4850         | 26163548 | (54) |
| 62 | Stomatal Opening Model                                                          | 4932         | 27542373 | (55) |
| 63 | Pro-inflammatory Tumor Microenvironment in Acute Lymphoblastic Leukemia         | 4942         | 27594840 | (56) |
| 64 | CD4+ T Cell Differentiation and Plasticity                                      | 5025         | 26090929 | (26) |
| 65 | Lac Operon                                                                      | 5128         | 21563979 | (57) |
| 66 | Metabolic Interactions in the Gut Microbiome                                    | 5731         | 26102287 | (58) |
| 67 | Tumour Cell Invasion and Migration                                              | 5884         | 26528548 | (59) |
| 68 | CD4+ T cell Differentiation                                                     | 6678         | 22871178 | (6)  |
| 69 | Regulation of the L-arabinose operon of Escherichia coli.                       | 6885         | 28639170 | (60) |
| 70 | Aurora Kinase A in Neuroblastoma                                                | 7916         | 26616283 | (61) |
| 71 | Iron acquisition and oxidative stress response in aspergillus fumigatus.        | 7926         | 25908096 | (62) |
| 72 | MAPK Cancer Cell Fate Network                                                   | 7984         | 24250280 | (63) |
| 73 | Treatment of Castration-Resistant Prostate Cancer                               | 8048         | 28361666 | (64) |
| 74 | Lymphopoiesis Regulatory Network                                                | 8080         | 26408858 | (65) |
| 75 | Lymphoid and myeloid cell specification and transdifferentiation                | 8186         | 28584084 | (66) |
| 76 | T-LGL Survival Network 2011 Reduced Network                                     | 8227         | 22102804 | (32) |
| 77 | Senescence Associated Secretory Phenotype                                       | 11863        | 29206223 | (67) |
| 78 | Signaling Pathway for Butanol Production in Clostridium beijerinckii NRRL B-598 | 36604        | 30718562 | (68) |

169 where we observe very strong effects for some conditions and not others. For instance, imagine condition  $x_1 = 0 \wedge x_2 = 1 \wedge x_3 = 1$   
170 leads to uncertain results about the expression of  $x_4$ ; say,  $x_4$  is expressed in only 60% of the experiments for that condition. In  
171 contrast, all other conditions lead to very certain observations of expression or inhibition of  $x_4$ . With this information, modelers,  
172 who have to decide on a acceptable threshold for evidence, may chose the relationship as  $x_4 = (x_1 \wedge x_2) \vee (x_1 \wedge x_2 \wedge x_3)$  (LUT  
173 in Figure 1 in main text with  $f_4 \equiv 011 : 0$ ) rather than  $x_4 = (x_1 \wedge x_2) \vee (x_2 \wedge x_3)$  (LUT with  $f_4 \equiv 011 : 1$ ).

174 Notice that in network inference, modelers often consider each node's LUT condition independently, as they can result from  
175 different experimental evidence. This means that the resulting LUTs are not necessarily further checked for logical redundancy  
176 or even incoherence (tautologies and contradictions). For instance, the *Thaliana* model (Figure 4, main text) contains three fully  
177 redundant edges, which ultimately result from "subjective decisions given alternatives with equivalent results" (7) regarding the  
178 expression of the *LFY* (*Leafy*) and *TFL1* (*Terminal Flower 1*) proteins. Certainly, our methodology to quantify redundancy in  
179 automata networks can also serve as an additional logical check on these models to avoid and understand the existence of  
180 completely redundant interactions derived from incomplete experimental evidence or modeling decisions.

### 181 3. Effectiveness Gini

182 Given a vector of  $n$  values  $[x_1, x_2, \dots, x_n]$ , the Gini coefficient is defined as:

$$183 \quad G = \frac{\sum_{i,j} |x_i - x_j|}{2n^2 \bar{x}} \quad [5]$$

184 where  $\bar{x}$  is the mean of the values. Note that, due to finite-size effects, the maximal Gini coefficient for automata of degree  
185  $k = 6$  is only 0.833, found when the vector is  $[0, 0, 0, 0, 0, 1]$ . As the number of samples increases, the maximal Gini coefficient  
186 approaches 1.

### 187 4. The effective graph and the spread of perturbations

188 Here we consider bit-flip perturbations to individual variables, defined as altering the logical state of the variable. In principle,  
189 the same framework can be used to study more elaborate classes of dynamic perturbations, including multi-variable bit flips or

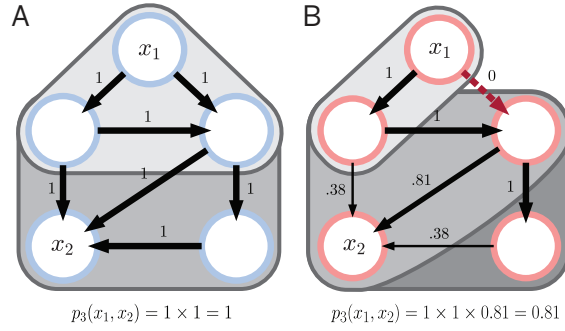

**Fig. S1. The effective graph captures the spread of perturbations. A** In the  $\mathcal{M}_{IG}$  model, perturbations from automata  $x_1$  spread equally to all connected variables at  $t$  steps away in the interaction graph of an example BN. **B** In the  $\mathcal{M}_{EG}$  model, the effective graph of a BN constrains the spread of perturbations.

pinning perturbations. Changes to the system structure by changing variable transition functions through the addition or removal of an input are not considered.

The impact of a perturbation on an automaton in a BN is quantified by the Boolean analogue of the partial derivative (71):

$$\partial_t^{(i)} x_j(\mathbf{x}_\alpha) = |x_j^t(\mathbf{x}_\alpha) - x_j^t(\mathbf{x}_\alpha^{-i})|, \quad [6]$$

where  $x_j^t(\mathbf{x}_\alpha)$  denotes the state (truth value) of automaton node  $x_j$  at time  $t$  when the BN is initiated with configuration  $\mathbf{x}^0 = \mathbf{x}_\alpha$  at time  $t = 0$ , and  $\mathbf{x}_\alpha^{-i}$  denotes configuration  $\mathbf{x}_\alpha$  with the state (truth value) of automaton  $x_i$  negated. In other words, the partial derivative yields 1 if flipping the state of  $x_i$  in initial configuration  $\mathbf{x}^0$  leads to  $x_j$  flipping its state at time  $t$ , and 0 otherwise. The total impact on automaton  $x_j$  of perturbations to automaton  $x_i$  after  $t$  steps is found by averaging over all initial configurations:

$$l_{ij}(t) = 2^{-N} \sum_{\alpha=1}^{2^N} \partial_t^{(i)} x_j(\mathbf{x}_\alpha). \quad [7]$$

For large BNs, the exact calculation of  $l_{ij}(t)$  becomes computationally infeasible and is approximated by averaging over a random sample of initial network configurations.

The interaction graph defines the light-cone of perturbation spreading, but it cannot differentiate the potential impact to nodes within the cone. Specifically, since signals between two nodes cannot travel faster than the minimum number of edges (thus, time steps  $t$ ) between them, the interaction graph provides an upper bound on the number of variables potentially affected by a perturbation after  $t$  time steps. We capture this upper bound in model  $\mathcal{M}_{IG}$ . The model  $\mathcal{M}_{IG}$  partitions the nodes into two groups: all nodes connected via a path of at most  $t$  edges starting from node  $x_j$  are equally impacted by a perturbation to node  $x_j$ , where  $t$  is the number of time steps since the perturbation, and all other nodes are not impacted by the perturbation. For simplicity, this model considers only the minimum path length from the perturbed node  $x_j$ , and does not account for loops or multiple paths.

The effective graph has at least two advantages for capturing the spread of perturbations: 1) it more accurately defines the light-cone of perturbation spreading since it removes interactions that are fully redundant, and 2) it provide edge weights that can differentiate the potential impact to nodes within the cone. The second model  $\mathcal{M}_{EG}$  thus ranks the node variables within the perturbation light-code based on the weights along the most effective path from  $x_j$  to the variable. Specifically, the propensity for a perturbation to be transmitted along a path in  $\mathcal{M}_{EG}$  is given by the maximum product of edge strengths, constrained by the perturbation light-cone such that the number of edges in the path is less than the number of elapsed time steps. The maximum product path is calculated by finding the minimum additive path of negative log edge effectiveness.

Implementations of both models for perturbation spreading provided in the CANA python package(4).

For the random BN experiment we generate 100 sample networks with  $N = 100$  nodes, and in which all nodes have an in-degree of 3, and average bias  $\bar{\rho} = 0.4$  (SI, S3). The network topology is randomized using a configuration model such that multi-edges are not allowed (each multi-edge is randomly swapped with another edge until no multi-edges remain). Self-loops are allowed. For each of the 100 randomly constructed networks, we sample 10 nodes at random to perturb. For each of the focus nodes, the dynamical impact on all other nodes is approximated using trajectories starting from  $10^4$  random initial configurations.

## 5. The effective graph improves structure-based control

The discovery of control strategies in BN models is a central problem in systems biology and biomedicine because predictions about controllability can help focus experimental interventions on genes, proteins and even medications more likely to result in the desired phenotype or medical outcome. Accurate control predictions would facilitate, for example, the design of advanced disease therapeutics(72, 73) or intervention strategies to reprogram cells(74), e.g. to revert a mutant cell to a wild-type state.

229 It is well known that when the set of automata nodes  $X$  of a BN is large, enumeration of all configurations  $\mathbf{x} \in \mathcal{X}$  of its STG  
 230 becomes difficult, making the controllability of BN an NP-hard problem (75). Therefore, control methodologies which leverage  
 231 the interaction graph or otherwise simplify the dynamics are highly desirable since they can greatly simplify the complexity of  
 232 BN control(3, 73).

233 Two recent methodologies aim to determine the controllability of complex dynamical systems based solely from the graph of  
 234 interactions between variables: structural controllability (SC)(76), and feedback-vertex set control (FVC)(73, 77). By using  
 235 only the structural graph to predict minimum sets of variables that are needed to control a network (a.k.a. driver nodes), both  
 236 of these methods make predictions about the entire ensemble of dynamical systems that fit the same interaction graph—rather  
 237 than a specific multivariate dynamical system, such as a BN(78).

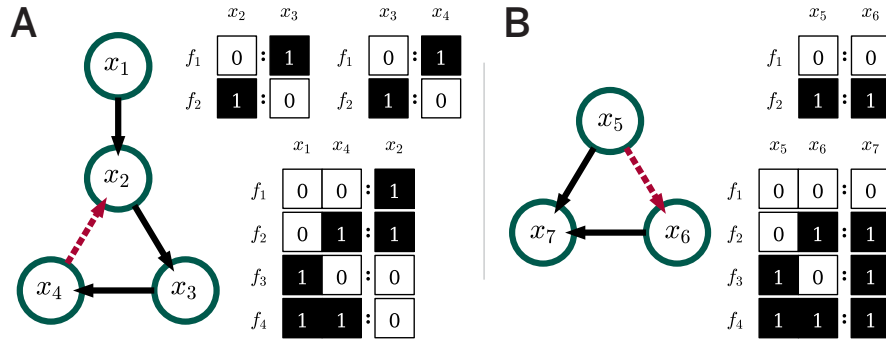

**Fig. S2. Fully redundant edges in the effective graph and structural control.** Two examples of BN in which canalization alters the predictions of structure-based control methods. **(A)**, A small BN with a fully canalized interaction between nodes  $x_4$  and  $x_2$  (dashed red). The predictions of SC and FVC on the structural graph suggest two nodes ( $x_1$  and one of  $x_2, x_3$ , or  $x_4$ ) are required to control the network dynamics, while the same methods applied to the effective graph accurately identify that only node  $x_1$  is required to fully control the network. **(B)**, A small BN with a fully canalized interaction between nodes  $x_5$  and  $x_6$  (red). The predictions of SC, MDS and FVC on the structural graph suggest only node  $x_5$  is required to control the network dynamics, while the same methods applied to the effective graph accurately identify that both nodes  $x_5$  and  $x_6$  are required to fully control the network.

238 Here, we demonstrate that the effective graph is a more accurate representation of interactions between variables with  
 239 important consequences for structural approximations of control, such as SC and FVC. Specifically, the redundancy of some  
 240 logical functions means that the effective structure of interactions is reduced: fully-canalized edges of the structural graph play  
 241 no role in determining the transitions between configurations. The presence of such canalization can both decrease or increase  
 242 the estimated driver variable sets using structure-based control methods.

243 We illustrate how canalization can reduce the number of predicted driver variables using the BN shown in Fig. S2A. Both  
 244 SC and FVC would predict that interventions on two nodes are required to control the system dynamics ( $x_1$  and one of  $x_2, x_3$ ,  
 245 or  $x_4$ ). However, the interaction between nodes  $x_4$  and  $x_2$  is fully canalized (red edge), meaning that it should be disregarded  
 246 by the structure-based methods. Applying both SC and FVC to the effective graph correctly reveals that only node  $x_1$  is  
 247 required to control the system.

248 On the other hand, canalization can also increase the number of predicted driver variables as illustrated by the BN shown in  
 249 Fig. S2B. In this case, both SC and FVC would predict that interventions on node  $x_5$  are sufficient to control the system  
 250 dynamics. The effective graph reveals that the interaction between nodes  $x_5$  and  $x_6$  is full canalized (red edge); using the  
 251 effective graph, SC and FVC correctly predict that both nodes  $x_5$  and  $x_6$  are required to control the system.

## 252 6. Effective graph and control

253 Similar insights about the control patterns from individual driver variables can be seen when comparing the minimum driver  
 254 variable set for pinning controllability predicted by FVC (73, 77), with the real one obtained by full enumeration of all possible  
 255 node sets in the STG (78). Recall that pinning controllability specifies a system can be controlled from any initial configuration  
 256 to any of its attractors via “pinning” the driver variables to their state(s) in the target attractor (77). For the *Arabidopsis*  
 257 *thaliana* BN model, in addition to the input nodes, FVC predicts the network to be pinning controllable with interventions  
 258 to the 6 additional variables  $D_{FVC} = \{WUS, AP3, AG, TFL1, LFY, PI\}$ . However, enumeration of the STG (78) reveals  
 259 that there are actually 3 equivalent minimum driver variable sets required for pinning control, each with only 5 additional  
 260 variables:  $D_{pin} = \{WUS, AP3, AG\} \cup \{\{AP1, LFY\} \vee \{TFL1, EMF1\} \vee \{TFL1, LFY\}\}$ . The effective graph reveals why  
 261 FVC overestimates this minimum set, and why a multiplicity of sets are equally effective in pinning control. First, note that all  
 262 of the self-loops to  $PI$ ,  $AP3$ , and  $AG$  have negligible edge effectiveness, and thus do not need to be controlled because  
 263 its self-loop is negligible and edges with stronger effectiveness exist from  $LFY$ ,  $AP3$  and  $AG$  that can control it (see Fig. 4C).

264 The effective graph reveals that some loops are removed entirely with fully redundant edges (i.e.  $TFL1 \leftrightarrow AP2$  and  
 265  $AP1 \leftrightarrow LFY$ ), or almost removed with very low effectiveness edges (e.g. the  $PI$  and  $AG$  self-loops), which help explain  
 266 the differences between the FVC-predicted and real pinning control driver sets. Several interesting observations derive by  
 267 looking at the effective graph and comparing  $D_{FVC}$  with  $D_{Pin}$ . Recall that FVC theory requires that all loops, including



variable self-loops, need to be controlled by at least one variable that interrupts the loop. The fully redundant edge between *AP2* and *TFL1* removes the loop between these variables which means that *TFL1* is not always necessary to control the network and *AP1* with *LFY* can control *TFL1* and *AP2*. Similarly, in the real pinning control driver set, *EMF1* can take the place of *LFY*, which is not allowed by the FVC prediction. The effective graph shows that this happens because the fully redundant edge between *AP1* and *LFY* removes the loop between these variables, and so *LFY* is not always needed to control the network—since all the loops with effective edges ( $e_{ij} > 0$ ) in which *LFY* participates can be interrupted by pinning *TFL1* and *EMF1*.

These observations demonstrate that while FVC predicts the necessary driver set to control the entire ensemble of BN that fit the same interaction graph (Fig. 4A), the effective graph of a specific BN can reduce the size of the necessary driver set and help identify alternative control strategies and most important variables to control, as is the case of the effective graph of the TBN model (Fig. 4B). These features make the effective graph useful to analyze control propagation in BN systems biology models, by providing more specific understanding of the effective pathways to control dynamics. This suggests that applying FVC to the effective graph can lead to more accurate (pinning) control predictions. The development of such a method is beyond the scope of this article, but we can at least demonstrate that in the case of the TBN model the effective graph with a threshold of  $e_{ij} \geq 0.2$  (Fig. S4) best explains the real pinning control driver set. If we apply FVC to this graph the result is  $D_{Pin} - AG$ . That is, it only misses the *AG* variable, which is needed for pinning control. A closer inspection of the full effective graph (Fig. 4B) reveals that *AG* participates in three low-effectiveness loops\* that are not interrupted by other variables in  $D_{Pin}$ . In contrast, *PI* which is not needed for real control (not in  $D_{Pin}$  though in  $D_{FVC}$ ), participates in a single low-effectiveness loop (its own self-loop) that is not interrupted by other variables in  $D_{Pin}$ . This strongly suggests that the number of low-effectiveness loops may be cumulative and needs to be accounted for, a hypothesis we will address in future work.

Similarly, in the real pinning control driver set, *EMF1* can take the place of *LFY*, which is not allowed by the FVC prediction. The effective graph shows that this happens because the fully redundant edge between *AP1* and *LFY* removes the loop between these variables, and so *LFY* is not always needed to control the network—since all the loops with effective edges ( $e_{ij} > 0$ ) in which *LFY* participates can be interrupted by pinning *TFL1* and *EMF1*.

In summary, we need to control *LFY* because it can control every other node, but we need to control *WUS* only for its own sake. This type of information is very useful for considering intervention strategies in Biology. If *WUS*'s final state is not of high importance, we can control most of the network by intervening only on *LFY*: its impact/power on the rest of the network is much higher.

## 7. Effective graph reveals dynamically-decoupled modules

The analysis of perturbation spread in complex dynamical systems can reveal dynamical modules that constrain this spread (79). Such modules are often related to well-known pathways with important roles in biochemical regulation and signalling. As shown for the ER+ breast cancer and TBN models, by thresholding the effective graph and eliminating edges with small effectiveness, we reveal subgraphs with greater dynamical influence, as well as those that are more or less decoupled from the rest of the network. One way to characterize such dynamical modularity is to compute the strongly and weakly connected components of the effective graph for various effectiveness thresholds, and compare them to the interaction graph; Tables S2 & S3 in SI show such an analyses for the four networks studied in detail above. Strongly connected components reveal modules where every node can in principle perturb every other node in same module, and weakly connected components those where some of the (driver) nodes can perturb all nodes in module. The size of such components can also reveal how fractured the dynamics of a network is.

As shown in Fig. S23A, B, the 78 biochemical BN models from the Cell Collective vary in how dynamically-decoupled modules arise as we change the effectiveness threshold. For example, the TBN model (green) splits into several weakly connected components at a relatively low effectiveness value ( $e_{ij} = 0.1$ ), but the largest component contains most of the network for a wide range of effectiveness values, at least 80% for  $e_{ij} \leq 0.5$ —which demonstrates the existence of the single primary dynamical module driven by the *LFY* protein described above. In contrast, the ER+ Breast Cancer model (orange) fractures into many small components at  $e_{ij} \approx 0.4$ , with the largest weakly connected component comprising less than 20% of the network—which is coherent with the patchwork composition of several dynamically distinct modules discussed above.

Overall, analysis of the 78 network models in the Cell Collective reveals that for edge effectiveness  $e_{ij} \leq 0.2$  or even  $e_{ij} \leq 0.4$ , the majority of networks remain connected in a single or largest weakly connected component comprised of most nodes. As shown in Fig. S24, for  $e_{ij} \leq 0.2$ , about 90% of the networks have a largest weakly connected component comprised of at least 80% of the network. For  $e_{ij} \geq 0.4$ , on the other hand, most networks quickly lose a substantial largest weakly connected component, and for  $e_{ij} \geq 0.65$ , no networks have a largest weakly connected component comprised of even 70% of the network. That is, most networks break into many small components when  $e_{ij} \in [0.4, 0.6]$ . In this sense, connectivity, signal transmission, and dynamical control in these networks tends to be robust to removal of edges with  $e_{ij} \leq 0.2$  even up to  $e_{ij} \leq 0.4$ . This suggests  $e_{ij} \in [0.2, 0.4]$  is an optimum range for effectiveness, whereby redundant edges are removed but effective edges remain to reliably send signals through mostly connected networks.

\*  $AG \leftrightarrow WUS$ , and  $AG \leftrightarrow AP1$ ,  $AG \leftrightarrow AG$ .

324 **References**

325 1. Quine WV (1955) A Way to Simplify Truth Functions. *American Mathematical Monthly* 62:627–631.

326 2. McCluskey EJ (1956) Minimization of boolean functions. *The Bell System Technical Journal* 35(6):1417–1444.

327 3. Marques-Pita M, Rocha LM (2013) Canalization and control in automata networks: body segmentation in *Drosophila*

328 melanogaster. *PLoS ONE* 8(3):e55946.

329 4. Correia RB, Gates AJ, Wang X, Rocha LM (2018) Cana: A python package for quantifying control and canalization in

330 boolean networks. *Frontiers in Physiology* 9.

331 5. Shmulevich I, Kauffman SA (2004) Activities and sensitivities in boolean network models. *PRL* 93(4):048701.

332 6. Helikar T, et al. (2012) The cell collective: Toward an open and collaborative approach to systems biology. *BMC Systems*

333 *Biology* 6:96.

334 7. Espinosa-Soto C, Padilla-Longoria P, Alvarez-Buylla ER (2004) A gene regulatory network model for cell-fate determination

335 during *Arabidopsis thaliana* flower development that is robust and recovers experimental gene expression profiles. *The*

336 *Plant Cell Online* 16(11):2923–2939.

337 8. Chaos Á, et al. (2006) From Genes to Flower Patterns and Evolution: Dynamic Models of Gene Regulatory Networks.

338 *Journal of Plant Growth Regulation* 25(4):278–289.

339 9. Li F, Long T, Lu Y, Ouyang Q, Tang C (2004) The yeast cell-cycle network is robustly designed. *PNAS* 101:4781–4786.

340 10. Zañudo J, Scaltriti M, Albert R (2017) A network modeling approach to elucidate drug resistance mechanisms and predict

341 combinatorial drug treatments in breast cancer. *Cancer Convergence* 1(1).

342 11. Helikar T, Konvalina J, Heidel J, Rogers JA (2008) Emergent decision-making in biological signal transduction networks.

343 *Proceedings of the National Academy of Sciences* 105(6):1913–1918.

344 12. Raza S, et al. (2008) A logic-based diagram of signalling pathways central to macrophage activation. *BMC Systems*

345 *Biology* p. 15.

346 13. Sahin Ö, et al. (2009) Modeling ERBB receptor-regulated G1/S transition to find novel targets for de novo trastuzumab

347 resistance. *BMC Systems Biology* p. 20.

348 14. Rodríguez A, et al. (2012) A boolean network model of the FA/BRCA pathway. *Bioinformatics* 28(6):858–866.

349 15. Singh A, Nascimento JM, Kowar S, Busch H, Boerries M (2012) Boolean approach to signalling pathway modelling in

350 hgf-induced keratinocyte migration. *Bioinformatics* 28(18):i495–i501.

351 16. Giacomantonio CE, Goodhill GJ (2010) A boolean model of the gene regulatory network underlying mammalian cortical

352 area development. *PLoS Computational Biology* 6(9):13.

353 17. Calzone L, et al. (2010) Mathematical modelling of cell-fate decision in response to death receptor engagement. *PLoS*

354 *Computational Biology* 6(3):15.

355 18. Kazemzadeh L, Cvijovic M, Petranovic D (2012) Boolean model of yeast apoptosis as a tool to study yeast and human

356 apoptotic regulations. *Frontiers in physiology* 3:446.

357 19. Herrmann F, Groß A, Zhou D, Kestler HA (2012) A boolean model of the cardiac gene regulatory network determining

358 first and second heart field identity. *PLOS ONE* 7(10):10.

359 20. Li S, Assmann SM (2006) Predicting essential components of signal transduction networks: A dynamic model of guard

360 cell abscisic acid signaling. *PLoS Biology* 4(10):17.

361 21. Saez-Rodriguez J, et al. (2007) A logical model provides insights into t cell receptor signaling. *PLoS Computational*

362 *Biology* 3(8):11.

363 22. Kervizic G, Corcos L (2008) Dynamical modeling of the cholesterol regulatory pathway with boolean networks. *BMC*

364 *Systems Biology* p. 14.

365 23. Zhang R, et al. (2008) Network model of survival signaling in large granular lymphocyte leukemia. *Proceedings of the*

366 *National Academy of Sciences* 105(42):16308–16313.

367 24. Gupta S, Bisht SS, Kukreti R, Jain S, Brahmachari SK (2007) Boolean network analysis of a neurotransmitter signaling

368 pathway. *Journal of Theoretical Biology* p. 7.

369 25. Ryll A, Samaga R, Schaper F, Alexopoulos LG, Klamt S (2011) Large-scale network models of IL-1 and IL-6 signalling

370 and their hepatocellular specificationw. *Molecular BioSystems* p. 18.

371 26. Martinez-Sanchez ME, Mendoza L, Villarreal C, Alvarez-Buylla ER (2015) A minimal regulatory network of extrinsic and

372 intrinsic factors recovers observed patterns of CD4+ t cell differentiation and plasticity. *PLoS Computational Biology*

373 p. 23.

374 27. Samaga R, Saez-Rodriguez J, Alexopoulos LG, Sorger PK (2009) The logic of EGFR/ErbB signaling: Theoretical

375 properties and analysis of high-throughput data. *PLoS Computational Biology* 5(8):19.

376 28. Mai Z, Liu H (2009) Boolean network-based analysis of the apoptosis network: Irreversible apoptosis and stable surviving.

377 *Journal of Theoretical Biology* p. 10.

378 29. Méndez A, Mendoza L (2016) A network model to describe the terminal differentiation of b cells. *PLOS Computational*

379 *Biology* p. 26.

380 30. Fauré A, Naldi A, Chaouiya C, Thieffry D (2006) Dynamical analysis of a generic boolean model for the control of the

381 mammalian cell cycle. *Bioinformatics* 22(14):e124–e131.

382 31. Todd RG (2012) Ergodic sets as cell phenotype of budding yeast cell cycle. *PLOS ONE* 7(10):10.

383 32. Saadatpour A, et al. (2011) Dynamical and structural analysis of a t cell survival network identifies novel candidate

384 therapeutic targets for large granular lymphocyte leukemia. *PLoS Comput Biol* 7(11):e1002267.

- 385 33. Irons DJ (2009) Logical analysis of the budding yeast cell cycle. *Journal of Theoretical Biology* p. 17.
- 386 34. Mbodj A, Junion G, Brun C, Furlong EEM, Thieffry D (2013) Logical modelling of drosophila signalling pathways. *Molecular BioSystems* 9(9):2248.
- 387
- 388 35. Orlando DA, et al. (2008) Global control of cell-cycle transcription by coupled CDK and network oscillators. *Nature* 453:5.
- 389 36. Klamt S, Saez-Rodriguez J, Lindquist JA, Simeoni L, Gilles ED (2006) A methodology for the structural and functional
- 390 analysis of signaling and regulatory networks. *BMC Bioinformatics* p. 26.
- 391 37. der Heyde S, et al. (2014) Boolean ErbB network reconstructions and perturbation simulations reveal individual drug
- 392 response in different breast cancer cell lines. *BMC Systems Biology* 8(1):75.
- 393 38. Oyeyemi OJ, Davies O, Robertson DL, Schwartz JM (2015) A logical model of hiv-1 interactions with the t-cell activation
- 394 signalling pathway. *Bioinformatics* 31(7):1075–1083.
- 395 39. Mendoza L, Xenarios I (2006) A method for the generation of standardized qualitative dynamical systems of regulatory
- 396 networks. *Theoretical Biology and Medical Modelling* p. 18.
- 397 40. Madrahimov A, Helikar T, Kowal B, Lu G, Rogers J (2013) Dynamics of influenza virus and human host interactions
- 398 during infection and replication cycle. *Bulletin of Mathematical Biology* 75(6):988–1011.
- 399 41. Silva-Rocha R, de Lorenzo V (2013) The tol network of pseudomonas putida mt-2 processes multiple environmental
- 400 inputs into a narrow response space. *Environmental microbiology* 15(1):271–286.
- 401 42. Thakar J, Pathak AK, Murphy L (2012) Network model of immune responses reveals key effectors to single and co-infection
- 402 dynamics by a respiratory bacterium and a gastrointestinal helminth. *PLoS Computational Biology* 8(1):19.
- 403 43. Christensen TS, Oliveira AP, Nielsen J (2009) Reconstruction and logical modeling of glucose repression signaling pathways
- 404 in saccharomyces cerevisiae. *BMC Systems Biology* p. 15.
- 405 44. Sridharan S, Layek R, Datta A, Venkatraj J (2012) Boolean modeling and fault diagnosis in oxidative stress response. *BMC Genomics* 13(Suppl 6):S4.
- 406 45. Conroy BD, et al. (2014) Design, assessment, and in vivo evaluation of a computational model illustrating the role of cav1
- 407 in cd4+ t-lymphocytes. *Frontiers in immunology* 5:599.
- 408 46. Lu J, et al. (2015) Network modelling reveals the mechanism underlying colitis-associated colon cancer and identifies novel
- 409 combinatorial anti-cancer targets. *Scientific reports* 5:14739.
- 410 47. Chasapi A, et al. (2015) An extended, boolean model of the septation initiation network in s.pombe provides insights into
- 411 its regulation. *PLOS ONE* p. 22.
- 412 48. Grieb M, et al. (2015) Predicting variabilities in cardiac gene expression with a boolean network incorporating uncertainty. *PLOS ONE* p. 15.
- 413 49. Offermann B, et al. (2016) Boolean modeling reveals the necessity of transcriptional regulation for bistability in pc12 cell
- 414 differentiation. *Frontiers in genetics* 7:44.
- 415 50. Ríos O, et al. (2015) A boolean network model of human gonadal sex determination. *Theoretical Biology and Medical*
- 416 *Modelling* 12(1):1–18.
- 417 51. Álvarez Silva MC (2015) Proteins interaction network and modeling of IGVH mutational status in chronic lymphocytic
- 418 leukemia. *Theoretical Biology and Medical Modelling* p. 15.
- 419 52. Rodríguez A (2015) Fanconi anemia cells with unrepaired DNA damage activate components of the checkpoint recovery
- 420 process. *Theoretical Biology and Medical Modelling* p. 22.
- 421 53. Ortiz-Gutiérrez E, García-Cruz K, Azpeitia E, Castillo A (2015) A dynamic gene regulatory network model that recovers
- 422 the cyclic behavior of arabidopsis thaliana cell cycle. *PLoS Computational Biology* p. 28.
- 423 54. Chudasama VL, Ovacik MA, Abernethy DR, Mager DE (2015) Logic-based and cellular pharmacodynamic modeling of
- 424 bortezomib responses in u266 human myeloma cells. *Journal of Pharmacology and Experimental Therapeutics* 354(3):448–
- 425 458.
- 426 55. Gan X (2016) Analysis of a dynamic model of guard cell signaling reveals the stability of signal propagation. *BMC Systems*
- 427 *Biology* p. 14.
- 428 56. Enciso J, Mayani H, Mendoza L, Pelayo R (2016) Modeling the pro-inflammatory tumor microenvironment in acute
- 429 lymphoblastic leukemia predicts a breakdown of hematopoietic-mesenchymal communication networks. *Frontiers in*
- 430 *physiology* 7:349.
- 431 57. Veliz-Cuba A, Stigler B (2011) Boolean models can explain bistability in the lac operon. *Journal of computational biology*
- 432 18(6):783–794.
- 433 58. Steinway SN, Biggs MB, Loughran TP, Papin JA, Albert R (2015) Inference of network dynamics and metabolic interactions
- 434 in the gut microbiome. *PLoS Computational Biology* p. 25.
- 435 59. Cohen DPA, et al. (2015) Mathematical modelling of molecular pathways enabling tumour cell invasion and migration. *PLoS Computational Biology* p. 29.
- 436 60. Jenkins A, Macauley M (2017) Bistability and asynchrony in a boolean model of the l-arabinose operon in escherichia coli. *Bulletin of mathematical biology* 79(8):1778–1795.
- 437 61. Dahlhaus M (2016) Boolean modeling identifies greatwall/MASTL as an important regulator in the AURKA network of
- 438 neuroblastoma. *Cancer Letters* p. 11.
- 439 62. Brandon M, Howard B, Lawrence C, Laubenbacher R (2015) Iron acquisition and oxidative stress response in aspergillus
- 440 fumigatus. *BMC Systems Biology* p. 18.
- 441 63. Grieco L, Calzone L, Bernard-Pierrot I (2013) Integrative modelling of the influence of MAPK network on cancer cell fate
- 442
- 443
- 444
- 445

- 446 decision. *PLoS Computational Biology* 9(10):15.
- 447 64. Arshad OA (2017) Towards targeted combinatorial therapy design for the treatment of castration-resistant prostate cancer.
- 448 *BMC Bioinformatics* p. 11.
- 449 65. Mendoza L (2015) A dynamical model of the regulatory network controlling lymphopoiesis. *Biosystems* p. 8.
- 450 66. Collombet S, et al. (2017) Logical modeling of lymphoid and myeloid cell specification and transdifferentiation. *Proceedings*
- 451 *of the National Academy of Sciences* 114(23):5792–5799.
- 452 67. Meyer P, et al. (2017) A model of the onset of the senescence associated secretory phenotype after dna damage induced
- 453 senescence. *PLoS computational biology* 13(12):e1005741.
- 454 68. Patakova P, et al. (2019) Acidogenesis, solventogenesis, metabolic stress response and life cycle changes in clostridium
- 455 beijeirinkii nrrl b-598 at the transcriptomic level. *Scientific reports* 9(1):1–21.
- 456 69. Bitbol AF (2018) Inferring interaction partners from protein sequences using mutual information. *PLoS Computational*
- 457 *Biology* 14(11):e1006401.
- 458 70. James R, Crutchfield J (2017) Multivariate dependence beyond shannon information. *Entropy* 19(10):531.
- 459 71. Luque B, Solé RV (2000) Lyapunov exponents in random Boolean networks. *Physica A: Statistical Mechanics and its*
- 460 *Applications* 284(1-4):33–45.
- 461 72. Zhang R, et al. (2008) Network model of survival signaling in large granular lymphocyte leukemia. *PNAS* 105:16308–16313.
- 462 73. Zanudo JGT, Yang G, Albert R (2017) Structure-based control of complex networks with nonlinear dynamics. *PNAS*
- 463 114(28):7234–7239.
- 464 74. Wang RS, Albert R (2011) Elementary signaling modes predict the essentiality of signal transduction network components.
- 465 *BMC Systems Biology* 5.
- 466 75. Akutsu T, Hayashida M, Ching WK, Ng MK (2007) Control of Boolean networks: hardness results and algorithms for
- 467 tree structured networks. *Journal of Theoretical Biology* 244(4):670–679.
- 468 76. Liu YY, Slotine JJ, Barabási AL (2011) Controllability of complex networks. *Nature* 473:167–173.
- 469 77. Fiedler B, Mochizuki A, Kurosawa G, Saito D (2013) Dynamics and control at feedback vertex sets. i: Informative and
- 470 determining nodes in regulatory networks. *Journal of Dynamics and Differential Equations* 25(3):563–604.
- 471 78. Gates AJ, Rocha LM (2016) Control of complex networks requires both structure and dynamics. *Scientific Reports* 6:24456.
- 472 79. Kolchinsky A, Gates AJ, Rocha LM (2015) Modularity and the spread of perturbations in complex dynamical systems.
- 473 *Phy. Rev. E* 92(6):060801.

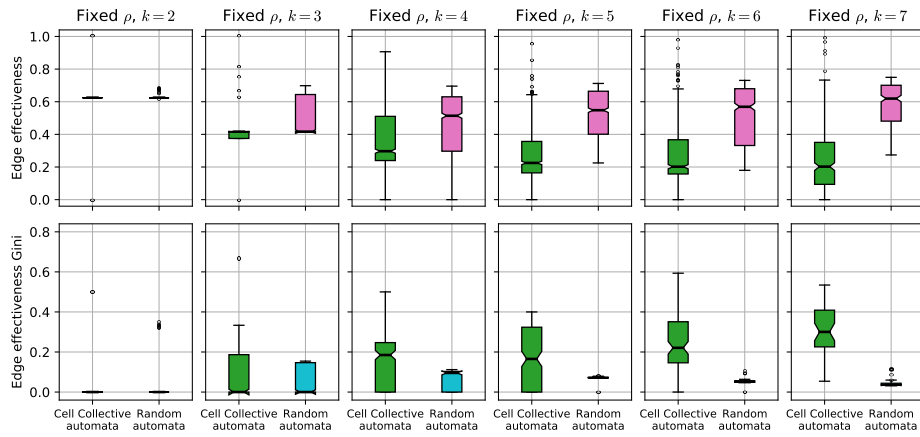

**Fig. S3. Edge effectiveness of Boolean automata in biochemical regulation and random ensembles of varying degree.** Top) Edge effectiveness of the 240 incoming edges (interactions) to 40 automata with varying degree in Cell Collective models (green) compared to a bias-matched sample of random Boolean automata (pink). Bottom) The Gini coefficient of the effectiveness of the incoming edges to the 40 automata with varying degree (green) in the Cell Collective models compared to the bias-matched ensemble of random Boolean automata (blue).

|                      |  | <b>Arabidopsis thaliana</b>             |              |              |              |
|----------------------|--|-----------------------------------------|--------------|--------------|--------------|
|                      |  | IG                                      | EG           | EG 0.2       | EG 0.4       |
| nodes                |  | 15                                      |              |              |              |
| self-loops           |  | 5 (33%)                                 |              |              |              |
| input nodes          |  | 3 (20%)                                 | 3 (20%)      | 3 (20%)      | 4 (27%)      |
| weakly conn. comp.   |  | 1 (15, 100%)                            | 1 (15, 100%) | 3 (13, 87%)  | 4 (12, 80%)  |
| strongly conn. comp. |  | 5 (10, 67%)                             | 6 (9, 60%)   | 8 (7, 47%)   | 10 (6, 40%)  |
|                      |  | <b>Saccharomyces cerevisiae (yeast)</b> |              |              |              |
|                      |  | IG                                      | EG           | EG 0.2       | EG 0.4       |
| nodes                |  | 12                                      |              |              |              |
| self-loops           |  | 8 (67%)                                 |              |              |              |
| input nodes          |  | 1 (8%)                                  | 1 (8%)       | 1 (8%)       | 1 (8%)       |
| weakly conn. comp.   |  | 1 (12, 100%)                            | 1 (12, 100%) | 1 (12, 100%) | 1 (12, 100%) |
| strongly conn. comp. |  | 3 (10, 83%)                             | 3 (10, 83%)  | 3 (10, 83%)  | 3 (10, 83%)  |
|                      |  | <b>Leukemia</b>                         |              |              |              |
|                      |  | IG                                      | EG           | EG 0.2       | EG 0.4       |
| nodes                |  | 60                                      |              |              |              |
| self-loops           |  | 11 (18%)                                |              |              |              |
| input nodes          |  | 6 (10%)                                 | 6 (10%)      | 6 (10%)      | 10 (17%)     |
| weakly conn. comp.   |  | 1 (60, 100%)                            | 1 (60, 100%) | 1 (60, 100%) | 2 (58, 97%)  |
| strongly conn. comp. |  | 12 (48, 80%)                            | 12 (48, 80%) | 27 (29, 48%) | 47 (9, 15%)  |
|                      |  | <b>Breast Cancer</b>                    |              |              |              |
|                      |  | IG                                      | EG           | EG 0.2       | EG 0.4       |
| nodes                |  | 80                                      |              |              |              |
| self-loops           |  | 23 (29%)                                |              |              |              |
| input nodes          |  | 18 (23%)                                | 18 (23%)     | 21 (26%)     | 29 (36%)     |
| weakly conn. comp.   |  | 1 (80, 100%)                            | 1 (80, 100%) | 3 (78, 98%)  | 12 (52, 65%) |
| strongly conn. comp. |  | 45 (24, 30%)                            | 45 (24, 30%) | 52 (17, 21%) | 70 (3, 4%)   |

**Table S2. Structural characteristics of four biochemical regulation networks. Number (and proportion) of nodes that are self-loops and inputs. Number of weakly and strongly connected components that exist for each graph; for each case, also shown in brackets is the number of nodes in largest component, followed by the proportion of network in largest component.**

|                         | <b>Thaliana</b>                         |                            |                            |                                  |
|-------------------------|-----------------------------------------|----------------------------|----------------------------|----------------------------------|
| {size: number of comp.} | IG                                      | EG                         | EG 0.2                     | EG 0.4                           |
| weakly conn. comp.      | {15: 1}                                 | {15: 1}                    | {13: 1, 1: 2}              | {12: 1, 1: 3}                    |
| strongly conn. comp.    | {10: 1, 2: 1, 1: 3}                     | {9: 1, 2: 1, 1: 4}         | {7: 1, 2: 1, 1: 6}         | {6: 1, 1: 9}                     |
|                         | <b>Saccharomyces cerevisiae (yeast)</b> |                            |                            |                                  |
|                         | IG                                      | EG                         | EG 0.2                     | EG 0.4                           |
| weakly conn. comp.      | {12: 1}                                 | {12: 1}                    | {12: 1}                    | {12: 1}                          |
| strongly conn. comp.    | {10: 1, 1: 2}                           | {10: 1, 1: 2}              | {10: 1, 1: 2}              | {10: 1, 1: 2}                    |
|                         | <b>Leukemia</b>                         |                            |                            |                                  |
|                         | IG                                      | EG                         | EG 0.2                     | EG 0.4                           |
| weakly conn. comp.      | {60: 1}                                 | {60: 1}                    | {60: 1}                    | {58: 1, 2: 1}                    |
| strongly conn. comp.    | {48: 1, 2: 1, 1: 10}                    | {48: 1, 2: 1, 1: 10}       | {29: 1, 4: 1, 2: 2, 1: 23} | {9: 1, 4: 1, 2: 2, 1: 43}        |
|                         | <b>Breast Cancer</b>                    |                            |                            |                                  |
|                         | IG                                      | EG                         | EG 0.2                     | EG 0.4                           |
| weakly conn. comp.      | {80: 1}                                 | {80: 1}                    | {78: 1, 1: 2}              | {52: 1, 13: 1, 4: 1, 3: 1, 1: 8} |
| strongly conn. comp.    | {24: 1, 8: 1, 2: 5, 1: 38}              | {24: 1, 8: 1, 2: 5, 1: 38} | {17: 1, 8: 1, 2: 5, 1: 45} | {3: 1, 2: 8, 1: 61}              |

**Table S3. Size and Number of structural components of four biochemical regulation models. For each type, components are listed in decreasing order of size (number of nodes), with the number of components of that size shown after each ‘:’.**

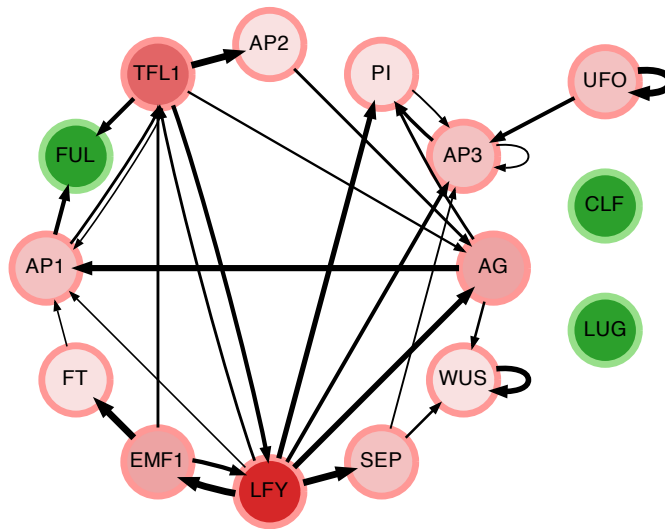

**Fig. S4. The effective graph in the *Arabidopsis thaliana* BN model.** The effective graph for the BN model of the *Arabidopsis thaliana*, in which edge thickness denotes its effectiveness, thresholded to  $e_{ji} > 0.2$ ; node color intensity denotes the node effective out-degree; green nodes denote variables with no effective out-degree.

| $x_i$ | $k$ | $k_r$ | $k_e$ | $k_r^*$ | $k_e^*$ | $k^{out}$ | $k_e^{out}$ | $k_e^{out}/k^{out}$ |
|-------|-----|-------|-------|---------|---------|-----------|-------------|---------------------|
| AG    | 9   | 6.9   | 2.1   | 0.77    | 0.23    | 5         | 1.9         | 0.38                |
| AP3   | 7   | 4.7   | 2.3   | 0.68    | 0.32    | 2         | 0.8         | 0.4                 |
| PI    | 6   | 3.8   | 2.2   | 0.64    | 0.36    | 2         | 0.47        | 0.24                |
| AP1   | 4   | 2.4   | 1.6   | 0.59    | 0.41    | 6         | 1.4         | 0.23                |
| LFY   | 4   | 2.8   | 1.2   | 0.69    | 0.31    | 7         | 4.8         | 0.69                |
| TFL1  | 4   | 2.8   | 1.2   | 0.69    | 0.31    | 5         | 2.8         | 0.57                |
| WUS   | 3   | 1.4   | 1.6   | 0.48    | 0.52    | 2         | 0.91        | 0.46                |
| FUL   | 2   | 0.75  | 1.2   | 0.38    | 0.62    | 1         | 0           | 0                   |
| UFO   | 1   | 0     | 1     | 0       | 1       | 2         | 1.6         | 0.79                |
| FT    | 1   | 0     | 1     | 0       | 1       | 1         | 0.24        | 0.24                |
| EMF1  | 1   | 0     | 1     | 0       | 1       | 3         | 2           | 0.68                |
| AP2   | 1   | 0     | 1     | 0       | 1       | 2         | 0.43        | 0.22                |
| SEP   | 1   | 0     | 1     | 0       | 1       | 4         | 0.9         | 0.22                |
| LUG   | 0   | 0     | 1     | 0       | 0       | 1         | 0.1         | 0.1                 |
| CLF   | 0   | 0     | 1     | 0       | 0       | 1         | 0.1         | 0.1                 |

Table S4. Canalization measures for variables in the *Arabidopsis thaliana* model.  $k$ ,  $k_r$ , and  $k_e$  denote in-degree, input redundancy and effective connectivity, respectively;  $k_r^*$  and  $k_e^*$  denote versions of  $k_r$ , and  $k_e$  normalized by  $k$ ;  $k^{out}$  and  $k_e^{out}$  denote out-degree and effective out-degree, respectively. Nodes with  $k = 1$  have no redundancy ( $k_r = 0, k_e = 1$ ), and input nodes have no incoming edges.



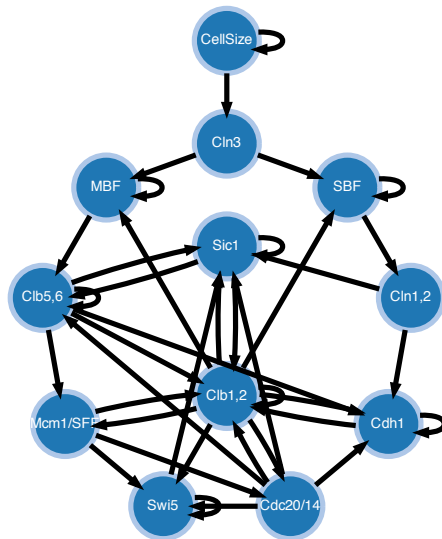

**Fig. S5.** The interaction graph in the *Saccharomyces cerevisiae* (yeast) BN model. The interaction graph for the BN model of *Saccharomyces cerevisiae*.

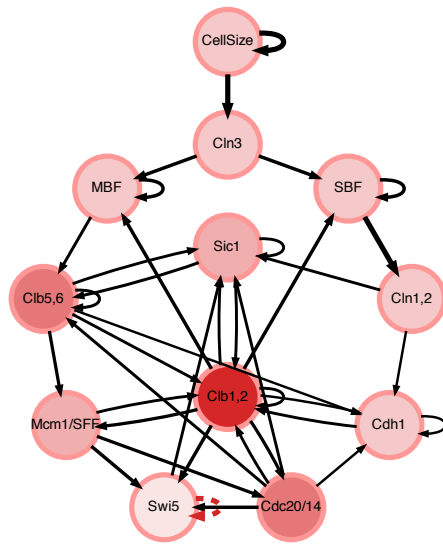

**Fig. S6. The effective graph in the *Saccharomyces cerevisiae* (yeast) BN model.** The effective graph for the BN model of *Saccharomyces cerevisiae*, in which edge thickness denotes its effectiveness,  $e_{ji}$ . Notice the fully redundant self-loop (dashed red) edge on the *Swi5* transcription factor node.

**Table S5. Canalization Measures for Variables in the *Saccharomyces cerevisiae* (yeast) model.**  $k$ ,  $k_r$ , and  $k_e$  denote in-degree, input redundancy and effective connectivity, respectively;  $k_r^*$  and  $k_e^*$  denote versions of  $k_r$ , and  $k_e$  normalized by  $k$ ;  $k^{out}$  and  $k_e^{out}$  denote out-degree and effective out-degree, respectively. Nodes with  $k = 1$  have no redundancy ( $k_r = 0$ ,  $k_e = 1$ ), and input nodes have no incoming edges.

| $x_i$    | $k$ | $k_r$ | $k_e$ | $k_r^*$ | $k_e^*$ | $k^{out}$ | $k_e^{out}$ | $k_e^{out}/k^{out}$ |
|----------|-----|-------|-------|---------|---------|-----------|-------------|---------------------|
| Sic1     | 6   | 2.7   | 3.3   | 0.44    | 0.56    | 3         | 1.7         | 0.56                |
| Clb1,2   | 6   | 2.7   | 3.3   | 0.44    | 0.56    | 8         | 4.8         | 0.6                 |
| Cdh1     | 5   | 2.6   | 2.4   | 0.53    | 0.47    | 2         | 1           | 0.52                |
| Clb5,6   | 4   | 1.7   | 2.3   | 0.42    | 0.58    | 5         | 2.8         | 0.56                |
| Swi5     | 4   | 2     | 2     | 0.5     | 0.5     | 2         | 0.56        | 0.28                |
| SBF      | 3   | 1     | 2     | 0.33    | 0.67    | 2         | 1.7         | 0.83                |
| MBF      | 3   | 1     | 2     | 0.33    | 0.67    | 2         | 1.2         | 0.62                |
| Mcm1/SFF | 2   | 0.75  | 1.2   | 0.38    | 0.62    | 3         | 1.8         | 0.62                |
| Cdc20/14 | 2   | 0.75  | 1.2   | 0.38    | 0.62    | 5         | 2.8         | 0.57                |
| CellSize | 1   | 0     | 1     | 0       | 1       | 2         | 2           | 1                   |
| Cln3     | 1   | 0     | 1     | 0       | 1       | 2         | 1.3         | 0.67                |
| Cln1,2   | 1   | 0     | 1     | 0       | 1       | 2         | 1           | 0.52                |

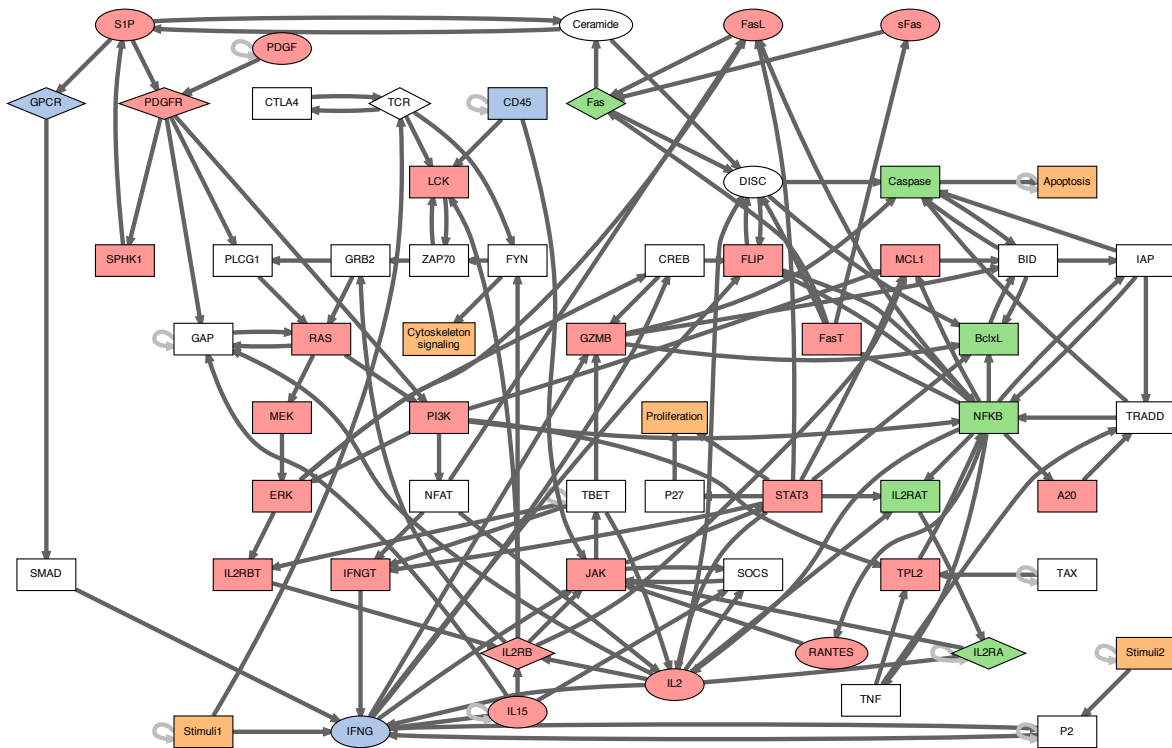

Fig. S7. The interaction graph in the Leukemia BN model. The interaction graph for the BN model of leukemia.

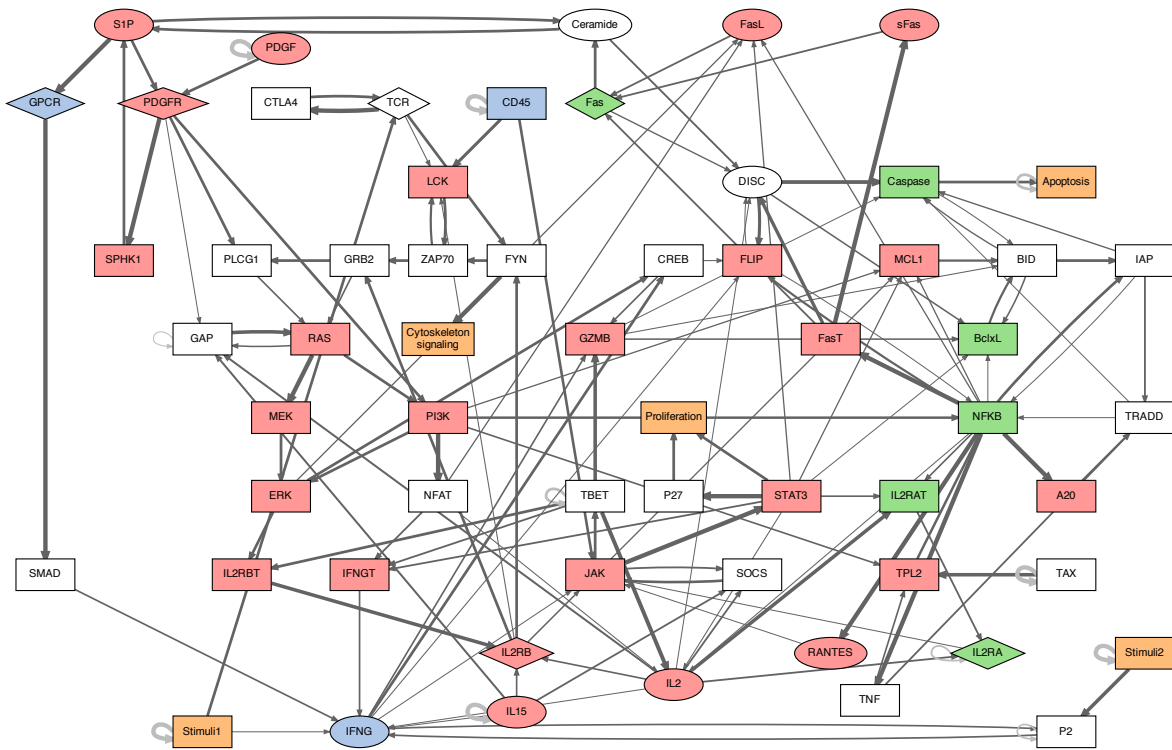

Fig. S8. The effective graph in the Leukemia BN model. The effective graph for the BN model of leukemia, in which edge thickness denotes its effectiveness,  $e_{ji}$ .

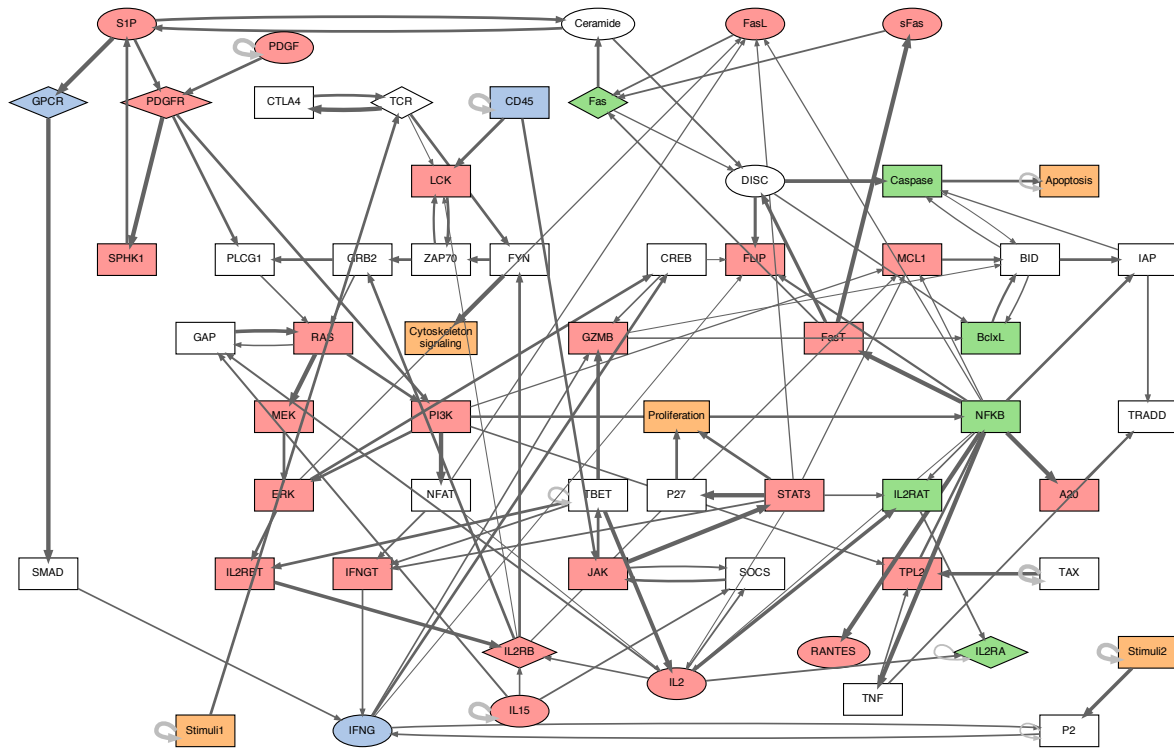

**Fig. S9.** The effective graph (thresholded to 0.2 in the Leukemia BN model. The effective graph for the BN model of leukemia, in which edge thickness denotes its effectiveness, thresholded to  $e_{ji} > 0.2$ .

**Table S6. Canalization measures for variables in the *Leukemia* model.**  $k$ ,  $k_r$ , and  $k_e$  denote in-degree, input redundancy and effective connectivity, respectively;  $k_r^*$  and  $k_e^*$  denote versions of  $k_r$ , and  $k_e$  normalized by  $k$ ;  $k^{out}$  and  $k_e^{out}$  denote out-degree and effective out-degree, respectively. Nodes with  $k = 1$  have no redundancy ( $k_r = 0, k_e = 1$ ), and input nodes have no incoming edges.

| $x_i$                  | $k$ | $k_r$ | $k_e$ | $k_r^*$ | $k_e^*$ | $k^{out}$ | $k_e^{out}$ | $k_e^{out}/k^{out}$ |
|------------------------|-----|-------|-------|---------|---------|-----------|-------------|---------------------|
| IFNG                   | 6   | 4.6   | 1.4   | 0.76    | 0.24    | 5         | 1.7         | 0.34                |
| JAK                    | 6   | 4.4   | 1.6   | 0.74    | 0.26    | 3         | 2           | 0.68                |
| GAP                    | 5   | 3.4   | 1.6   | 0.68    | 0.32    | 2         | 0.98        | 0.49                |
| Caspase                | 5   | 3.2   | 1.8   | 0.65    | 0.35    | 2         | 0.86        | 0.43                |
| DISC                   | 5   | 3.2   | 1.8   | 0.64    | 0.36    | 3         | 1.9         | 0.64                |
| NFKB                   | 5   | 3.4   | 1.6   | 0.68    | 0.32    | 11        | 6.5         | 0.59                |
| BclxL                  | 5   | 3.6   | 1.4   | 0.72    | 0.28    | 1         | 0.52        | 0.52                |
| BID                    | 4   | 2.5   | 1.5   | 0.62    | 0.38    | 3         | 1.3         | 0.43                |
| FLIP                   | 4   | 2.3   | 1.7   | 0.58    | 0.42    | 2         | 0.29        | 0.15                |
| LCK                    | 4   | 2.3   | 1.7   | 0.58    | 0.42    | 1         | 0.62        | 0.62                |
| MCL1                   | 4   | 2.8   | 1.2   | 0.7     | 0.3     | 1         | 0.52        | 0.52                |
| FasL                   | 4   | 2.8   | 1.2   | 0.7     | 0.3     | 1         | 0.42        | 0.42                |
| IL2                    | 4   | 2.4   | 1.6   | 0.59    | 0.41    | 7         | 2.7         | 0.39                |
| IFNGT                  | 3   | 1.8   | 1.2   | 0.58    | 0.42    | 1         | 0.39        | 0.39                |
| IL2RB                  | 3   | 1.4   | 1.6   | 0.48    | 0.52    | 5         | 1.9         | 0.38                |
| Fas                    | 3   | 1.7   | 1.3   | 0.58    | 0.42    | 2         | 0.94        | 0.47                |
| IL2RA                  | 3   | 1.7   | 1.3   | 0.58    | 0.42    | 2         | 0.51        | 0.26                |
| IL2RAT                 | 3   | 1.4   | 1.6   | 0.48    | 0.52    | 1         | 0.42        | 0.42                |
| TRADD                  | 3   | 1.7   | 1.3   | 0.58    | 0.42    | 2         | 0.29        | 0.15                |
| P2                     | 3   | 1.4   | 1.6   | 0.48    | 0.52    | 2         | 0.76        | 0.38                |
| TPL2                   | 3   | 1.4   | 1.6   | 0.48    | 0.52    | 1         | 0.57        | 0.57                |
| GZMB                   | 3   | 1.4   | 1.6   | 0.48    | 0.52    | 3         | 0.74        | 0.25                |
| RAS                    | 3   | 1.4   | 1.6   | 0.48    | 0.52    | 3         | 2           | 0.66                |
| SOCS                   | 3   | 1.7   | 1.2   | 0.58    | 0.42    | 1         | 0.6         | 0.6                 |
| GRB2                   | 2   | 0.75  | 1.2   | 0.38    | 0.62    | 2         | 1           | 0.5                 |
| FYN                    | 2   | 0.75  | 1.2   | 0.38    | 0.62    | 2         | 1.6         | 0.81                |
| PDGFR                  | 2   | 0.75  | 1.2   | 0.38    | 0.62    | 4         | 2.4         | 0.6                 |
| Apoptosis              | 2   | 0.75  | 1.2   | 0.38    | 0.62    | 1         | 0.62        | 0.62                |
| IAP                    | 2   | 0.75  | 1.2   | 0.38    | 0.62    | 3         | 0.88        | 0.29                |
| Ceramide               | 2   | 0.75  | 1.2   | 0.38    | 0.62    | 2         | 1.1         | 0.53                |
| TBET                   | 2   | 0.75  | 1.2   | 0.38    | 0.62    | 5         | 3.4         | 0.68                |
| TCR                    | 2   | 0.75  | 1.2   | 0.38    | 0.62    | 3         | 1.9         | 0.62                |
| PLCG1                  | 2   | 0.75  | 1.2   | 0.38    | 0.62    | 1         | 0.38        | 0.38                |
| ZAP70                  | 2   | 0.75  | 1.2   | 0.38    | 0.62    | 2         | 1.1         | 0.57                |
| Proliferation          | 2   | 0.75  | 1.2   | 0.38    | 0.62    | 0         | 0           | -                   |
| S1P                    | 2   | 0.75  | 1.2   | 0.38    | 0.62    | 3         | 2.2         | 0.75                |
| ERK                    | 2   | 0.75  | 1.2   | 0.38    | 0.62    | 3         | 1.5         | 0.52                |
| CREB                   | 2   | 0.75  | 1.2   | 0.38    | 0.62    | 2         | 0.61        | 0.31                |
| IL2RBT                 | 2   | 0.75  | 1.2   | 0.38    | 0.62    | 1         | 0.81        | 0.81                |
| PI3K                   | 2   | 0.75  | 1.2   | 0.38    | 0.62    | 5         | 2.9         | 0.57                |
| Stimuli                | 1   | 0     | 1     | 0       | 1       | 3         | 1.7         | 0.57                |
| Stimuli2               | 1   | 0     | 1     | 0       | 1       | 2         | 1.8         | 0.91                |
| GPCR                   | 1   | 0     | 1     | 0       | 1       | 1         | 1           | 1                   |
| IL15                   | 1   | 0     | 1     | 0       | 1       | 5         | 2.3         | 0.47                |
| CD45                   | 1   | 0     | 1     | 0       | 1       | 3         | 2.3         | 0.77                |
| SMAD                   | 1   | 0     | 1     | 0       | 1       | 1         | 0.39        | 0.39                |
| SPHK1                  | 1   | 0     | 1     | 0       | 1       | 1         | 0.62        | 0.62                |
| PDGF                   | 1   | 0     | 1     | 0       | 1       | 2         | 1.6         | 0.81                |
| CTLA4                  | 1   | 0     | 1     | 0       | 1       | 1         | 0.62        | 0.62                |
| A20                    | 1   | 0     | 1     | 0       | 1       | 1         | 0.42        | 0.42                |
| sFas                   | 1   | 0     | 1     | 0       | 1       | 1         | 0.42        | 0.42                |
| FasT                   | 1   | 0     | 1     | 0       | 1       | 3         | 2.2         | 0.73                |
| TNF                    | 1   | 0     | 1     | 0       | 1       | 2         | 0.79        | 0.4                 |
| P27                    | 1   | 0     | 1     | 0       | 1       | 1         | 0.62        | 0.62                |
| STAT3                  | 1   | 0     | 1     | 0       | 1       | 8         | 3.4         | 0.43                |
| RANTES                 | 1   | 0     | 1     | 0       | 1       | 1         | 0.095       | 0.095               |
| NFAT                   | 1   | 0     | 1     | 0       | 1       | 3         | 0.95        | 0.32                |
| MEK                    | 1   | 0     | 1     | 0       | 1       | 1         | 0.62        | 0.62                |
| Cytoskeleton_signaling | 1   | 0     | 1     | 0       | 1       | 0         | 0           | -                   |
| TAX                    | 1   | 0     | 1     | 0       | 1       | 2         | 1.8         | 0.91                |

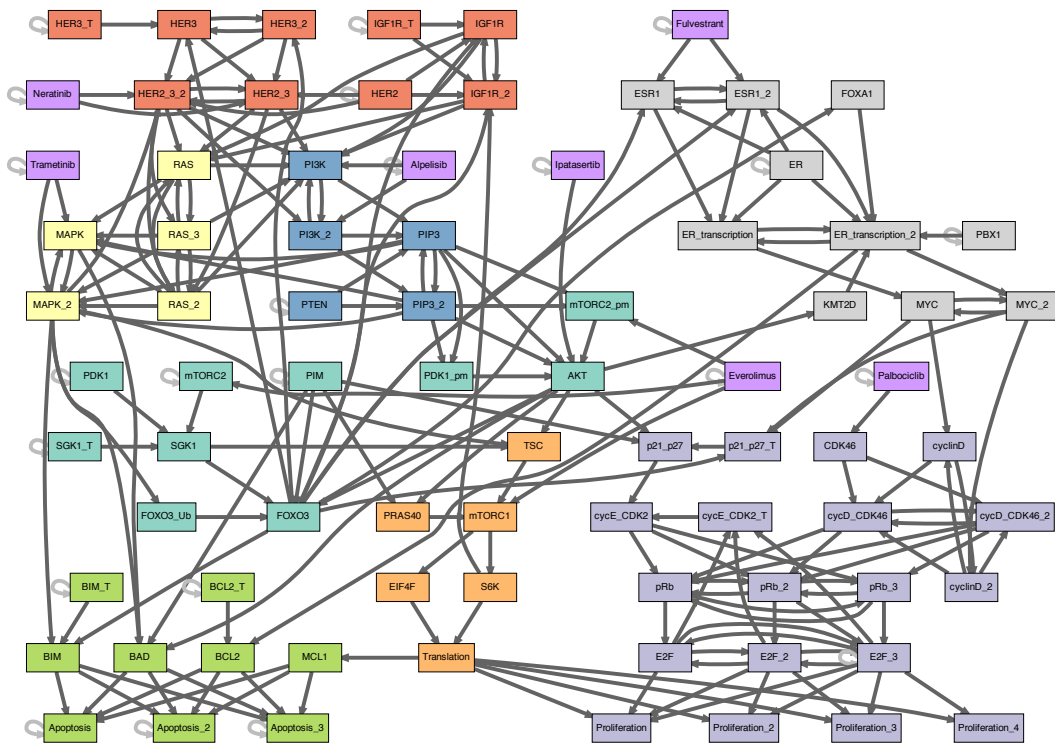

**Fig. S10. The interaction graph in the ER+ breast cancer BN model.** The goal of this model is to find interventions—especially single-node interventions—that synergize with the *PI3K* inhibitor *Alpelisib*, with particular interest on six other drugs used in cancer treatment: *Fulvestrant*, *Palbociclib*, *Everolimus*, *Neratinib*, *Trametinib*, and *Ipatasertib* (all drug nodes in Purple). Specifically, the goal is to study how well these drugs control cancer cells to apoptosis or proliferation, which in this model are specific variables (10). This is done by running Monte-Carlo simulations of the BN while setting *Alpelisib* to ON, in addition to setting baseline nodes to the cancerous state (Figs. S15-6), followed by setting the interventions to be tested to the appropriate state, for example, another Drug set to ON. See details in (10).



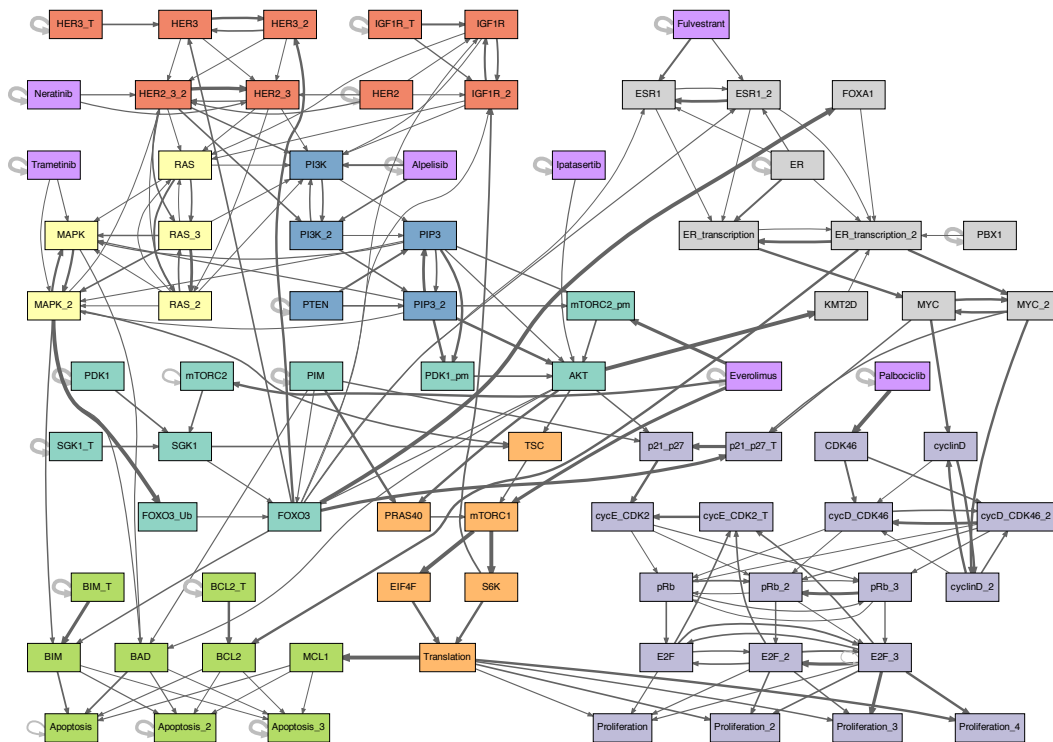

Fig. S11. The effective graph in the ER+ breast cancer BN model. Edge thickness denotes its effectiveness,  $e_{ji}$ .

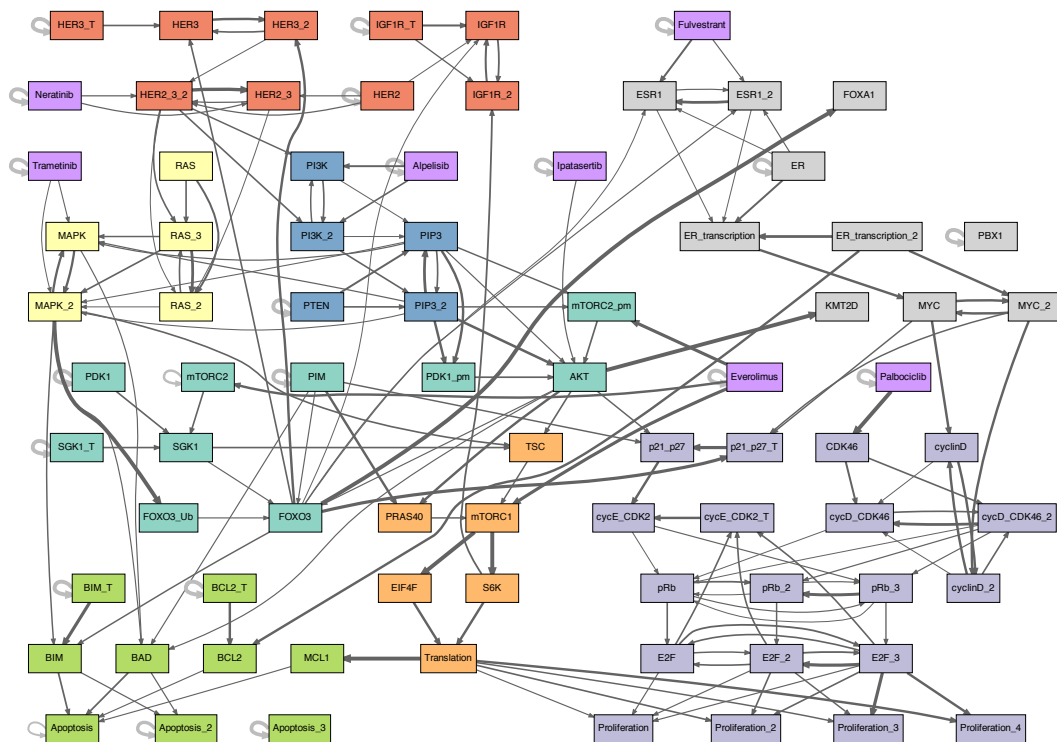

Fig. S12. The effective graph (thresholded to 0.2) in the ER+ breast cancer BN model. The effective graph for the BN model of ER+ breast cancer, in which edge thickness denotes its effectiveness, thresholded to  $e_{ji} > 0.2$ .

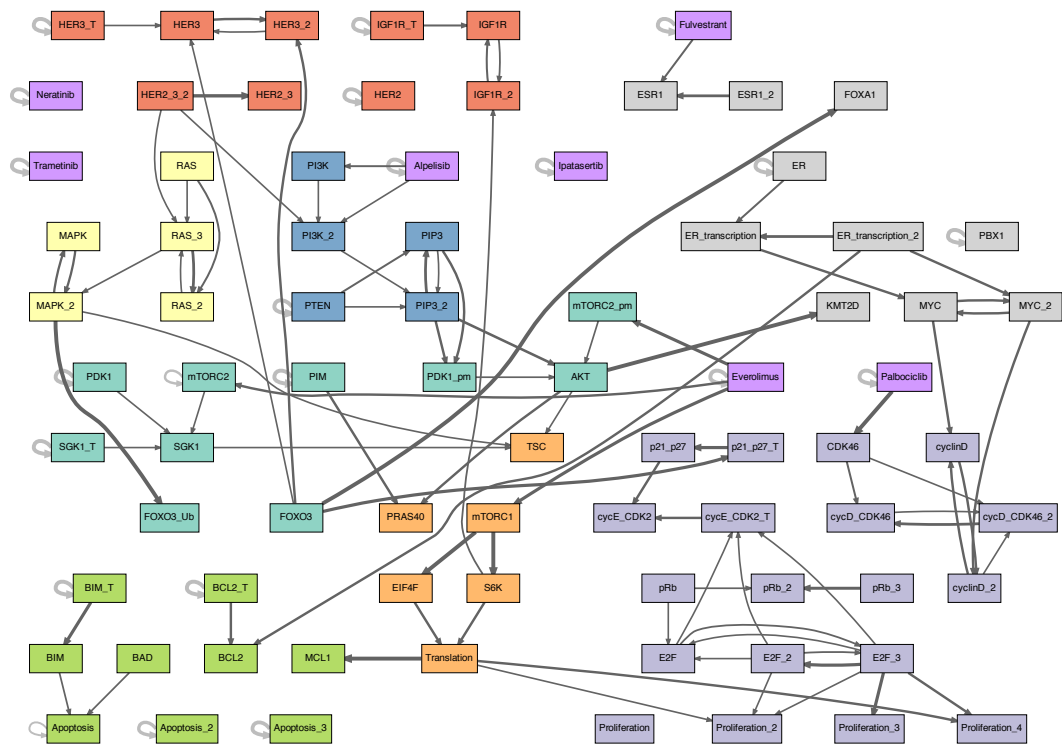

**Fig. S13. The effective graph (thresholded to 0.4) in the ER+ breast cancer BN model.** The effective graph for the BN model of ER+ breast cancer, in which edge thickness denotes its effectiveness, thresholded to  $e_{ji} > 0.4$ .

**Table S7. Canalization measures for variables in the *Breast Cancer* model.  $k$ ,  $k_r$ , and  $k_e$  denote in-degree, input redundancy and effective connectivity, respectively;  $k_r^*$  and  $k_e^*$  denote versions of  $k_r$ , and  $k_e$  normalized by  $k$ ;  $k^{out}$  and  $k_e^{out}$  denote out-degree and effective out-degree, respectively. Nodes with  $k = 1$  have no redundancy ( $k_r = 0, k_e = 1$ ), and input nodes have no incoming edges.**

| $x_i$              | $k$ | $k_r$ | $k_e$ | $k_r^*$ | $k_e^*$ | $k^{out}$ | $k_e^{out}$ | $k_e^{out}/k^{out}$ |
|--------------------|-----|-------|-------|---------|---------|-----------|-------------|---------------------|
| PI3K               | 9   | 7.4   | 1.6   | 0.82    | 0.18    | 2         | 0.66        | 0.33                |
| MAPK               | 7   | 4.9   | 2.1   | 0.7     | 0.3     | 2         | 0.88        | 0.44                |
| MAPK_2             | 6   | 4     | 2     | 0.67    | 0.33    | 6         | 2.8         | 0.47                |
| ER_transcription_2 | 6   | 4.9   | 1.1   | 0.82    | 0.18    | 3         | 2           | 0.65                |
| RAS                | 6   | 4.9   | 1.1   | 0.82    | 0.18    | 4         | 1.1         | 0.28                |
| HER2_3_2           | 6   | 4.5   | 1.5   | 0.76    | 0.24    | 6         | 2.5         | 0.41                |
| pRb_2              | 5   | 3.2   | 1.8   | 0.64    | 0.36    | 4         | 1.1         | 0.27                |
| AKT                | 5   | 2.9   | 2.1   | 0.57    | 0.43    | 6         | 3           | 0.5                 |
| HER2_3             | 5   | 3.2   | 1.8   | 0.65    | 0.35    | 4         | 0.81        | 0.2                 |
| pRb                | 5   | 3.9   | 1.1   | 0.78    | 0.22    | 3         | 1.2         | 0.38                |
| Apoptosis_3        | 5   | 3.4   | 1.6   | 0.68    | 0.32    | 1         | 0.95        | 0.95                |
| IGF1R_2            | 5   | 3.4   | 1.6   | 0.68    | 0.32    | 3         | 0.77        | 0.26                |
| Apoptosis          | 5   | 3     | 2     | 0.61    | 0.39    | 1         | 0.49        | 0.49                |
| E2F_3              | 5   | 3.4   | 1.6   | 0.68    | 0.32    | 8         | 4           | 0.5                 |
| Apoptosis_2        | 5   | 3.2   | 1.8   | 0.65    | 0.35    | 1         | 0.85        | 0.85                |
| ER_transcription   | 4   | 2.3   | 1.7   | 0.58    | 0.42    | 2         | 0.8         | 0.4                 |
| PIP3               | 4   | 2.3   | 1.7   | 0.58    | 0.42    | 6         | 2.3         | 0.38                |
| IGF1R              | 4   | 2.5   | 1.5   | 0.62    | 0.38    | 3         | 0.71        | 0.24                |
| FOXO3              | 4   | 2.8   | 1.2   | 0.7     | 0.3     | 9         | 4.2         | 0.46                |
| RAS_2              | 4   | 2.3   | 1.7   | 0.58    | 0.42    | 5         | 1           | 0.2                 |
| ESR1               | 4   | 2.3   | 1.7   | 0.58    | 0.42    | 2         | 0.54        | 0.27                |
| Proliferation      | 4   | 2.8   | 1.2   | 0.7     | 0.3     | 0         | 0           | -                   |
| cycD_CDK46         | 4   | 2.3   | 1.7   | 0.58    | 0.42    | 3         | 0.79        | 0.26                |
| BAD                | 4   | 2.8   | 1.2   | 0.7     | 0.3     | 3         | 0.92        | 0.31                |
| ESR1_2             | 4   | 2.8   | 1.2   | 0.7     | 0.3     | 3         | 1.1         | 0.38                |
| pRb_3              | 4   | 2.8   | 1.2   | 0.7     | 0.3     | 3         | 1.3         | 0.44                |
| BIM                | 3   | 1.4   | 1.6   | 0.48    | 0.52    | 3         | 0.92        | 0.31                |
| mTORC1             | 3   | 1.4   | 1.6   | 0.48    | 0.52    | 2         | 2           | 1                   |
| TSC                | 3   | 1.8   | 1.2   | 0.58    | 0.42    | 1         | 0.38        | 0.38                |
| cycE_CDK2_T        | 3   | 1.8   | 1.2   | 0.58    | 0.42    | 1         | 0.62        | 0.62                |
| p21_p27            | 3   | 1.4   | 1.6   | 0.48    | 0.52    | 1         | 0.62        | 0.62                |
| p21_p27_T          | 3   | 1.4   | 1.6   | 0.48    | 0.52    | 1         | 0.81        | 0.81                |
| E2F                | 3   | 1.8   | 1.2   | 0.58    | 0.42    | 4         | 1.5         | 0.39                |
| mTORC2_pm          | 3   | 1.4   | 1.6   | 0.48    | 0.52    | 1         | 0.43        | 0.43                |
| RAS_3              | 3   | 1.7   | 1.3   | 0.58    | 0.42    | 5         | 1.8         | 0.35                |
| E2F_2              | 3   | 1.4   | 1.6   | 0.48    | 0.52    | 6         | 2.4         | 0.4                 |
| cycD_CDK46_2       | 3   | 1.7   | 1.3   | 0.58    | 0.42    | 4         | 1.5         | 0.39                |
| SGK1               | 3   | 1.7   | 1.3   | 0.58    | 0.42    | 2         | 0.71        | 0.36                |
| Proliferation_2    | 3   | 1.8   | 1.2   | 0.58    | 0.42    | 0         | 0           | -                   |
| Proliferation_3    | 3   | 1.4   | 1.6   | 0.48    | 0.52    | 0         | 0           | -                   |
| PIP3_2             | 3   | 1.7   | 1.3   | 0.58    | 0.42    | 6         | 3           | 0.49                |
| PI3K_2             | 3   | 1.7   | 1.3   | 0.58    | 0.42    | 3         | 1           | 0.34                |
| HER3               | 3   | 1.8   | 1.2   | 0.58    | 0.42    | 3         | 0.89        | 0.3                 |
| cyclinD_2          | 2   | 0.75  | 1.2   | 0.38    | 0.62    | 3         | 1.3         | 0.43                |
| Translation        | 2   | 0.75  | 1.2   | 0.38    | 0.62    | 5         | 2.7         | 0.54                |
| MYC                | 2   | 0.75  | 1.2   | 0.38    | 0.62    | 3         | 1.6         | 0.54                |
| MYC_2              | 2   | 0.75  | 1.2   | 0.38    | 0.62    | 3         | 1.6         | 0.54                |
| cyclinD            | 2   | 0.75  | 1.2   | 0.38    | 0.62    | 2         | 0.86        | 0.43                |
| BCL2               | 2   | 0.75  | 1.2   | 0.38    | 0.62    | 3         | 0.6         | 0.2                 |
| Proliferation_4    | 2   | 0.75  | 1.2   | 0.38    | 0.62    | 0         | 0           | -                   |
| PRAS40             | 2   | 0.75  | 1.2   | 0.38    | 0.62    | 1         | 0.38        | 0.38                |
| mTORC2             | 2   | 0.75  | 1.2   | 0.38    | 0.62    | 2         | 1           | 0.52                |
| cycE_CDK2          | 2   | 0.75  | 1.2   | 0.38    | 0.62    | 3         | 0.67        | 0.22                |
| PDK1_pm            | 2   | 0.75  | 1.2   | 0.38    | 0.62    | 1         | 0.43        | 0.43                |
| HER3_2             | 2   | 0.75  | 1.2   | 0.38    | 0.62    | 3         | 0.81        | 0.27                |

Continues on the next page

Table S7 - Continued from previous page

| $x_i$       | $k$ | $k_r$ | $k_e$ | $k_r^*$ | $k_e^*$ | $k^{out}$ | $k_e^{out}$ | $k_e^{out}/k^{out}$ |
|-------------|-----|-------|-------|---------|---------|-----------|-------------|---------------------|
| S6K         | 1   | 0     | 1     | 0       | 1       | 2         | 1.1         | 0.54                |
| Fulvestrant | 1   | 0     | 1     | 0       | 1       | 3         | 1.8         | 0.6                 |
| Alpelisib   | 1   | 0     | 1     | 0       | 1       | 3         | 1.9         | 0.64                |
| Everolimus  | 1   | 0     | 1     | 0       | 1       | 4         | 3.2         | 0.81                |
| Trametinib  | 1   | 0     | 1     | 0       | 1       | 3         | 1.5         | 0.49                |
| Ipatasertib | 1   | 0     | 1     | 0       | 1       | 2         | 1.3         | 0.65                |
| Palbociclib | 1   | 0     | 1     | 0       | 1       | 2         | 2           | 1                   |
| Neratinib   | 1   | 0     | 1     | 0       | 1       | 3         | 1.6         | 0.54                |
| HER2        | 1   | 0     | 1     | 0       | 1       | 5         | 2           | 0.41                |
| HER3_T      | 1   | 0     | 1     | 0       | 1       | 2         | 1.4         | 0.71                |
| PDK1        | 1   | 0     | 1     | 0       | 1       | 2         | 1.4         | 0.71                |
| PIM         | 1   | 0     | 1     | 0       | 1       | 5         | 2.6         | 0.52                |
| SGK1_T      | 1   | 0     | 1     | 0       | 1       | 2         | 1.4         | 0.71                |
| ER          | 1   | 0     | 1     | 0       | 1       | 5         | 2.2         | 0.45                |
| CDK46       | 1   | 0     | 1     | 0       | 1       | 2         | 0.93        | 0.46                |
| PTEN        | 1   | 0     | 1     | 0       | 1       | 3         | 1.9         | 0.64                |
| KMT2D       | 1   | 0     | 1     | 0       | 1       | 1         | 0.18        | 0.18                |
| FOXO3_Ub    | 1   | 0     | 1     | 0       | 1       | 1         | 0.3         | 0.3                 |
| BIM_T       | 1   | 0     | 1     | 0       | 1       | 2         | 1.8         | 0.91                |
| BCL2_T      | 1   | 0     | 1     | 0       | 1       | 2         | 1.6         | 0.81                |
| PBX1        | 1   | 0     | 1     | 0       | 1       | 2         | 1.2         | 0.59                |
| FOXA1       | 1   | 0     | 1     | 0       | 1       | 1         | 0.18        | 0.18                |
| MCL1        | 1   | 0     | 1     | 0       | 1       | 3         | 0.6         | 0.2                 |
| EIF4F       | 1   | 0     | 1     | 0       | 1       | 1         | 0.62        | 0.62                |
| IGF1R_T     | 1   | 0     | 1     | 0       | 1       | 3         | 1.9         | 0.62                |

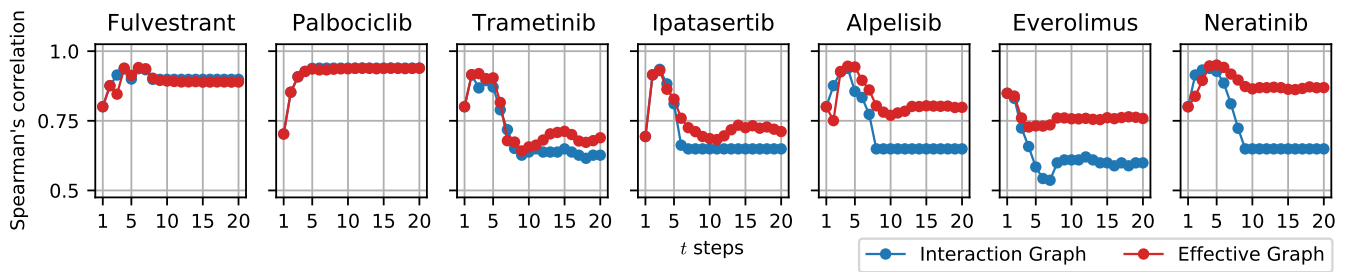

**Fig. S14. The spread of perturbations in the ER+ breast cancer BN model.** For each of the drug variable nodes, the predictive power of the path-length approximation using the interaction graph (blue), and the effective graph (red); measured by the Spearman's rank correlation (vertical axis) to the total impact of respective variable, after 20 steps (horizontal axis).

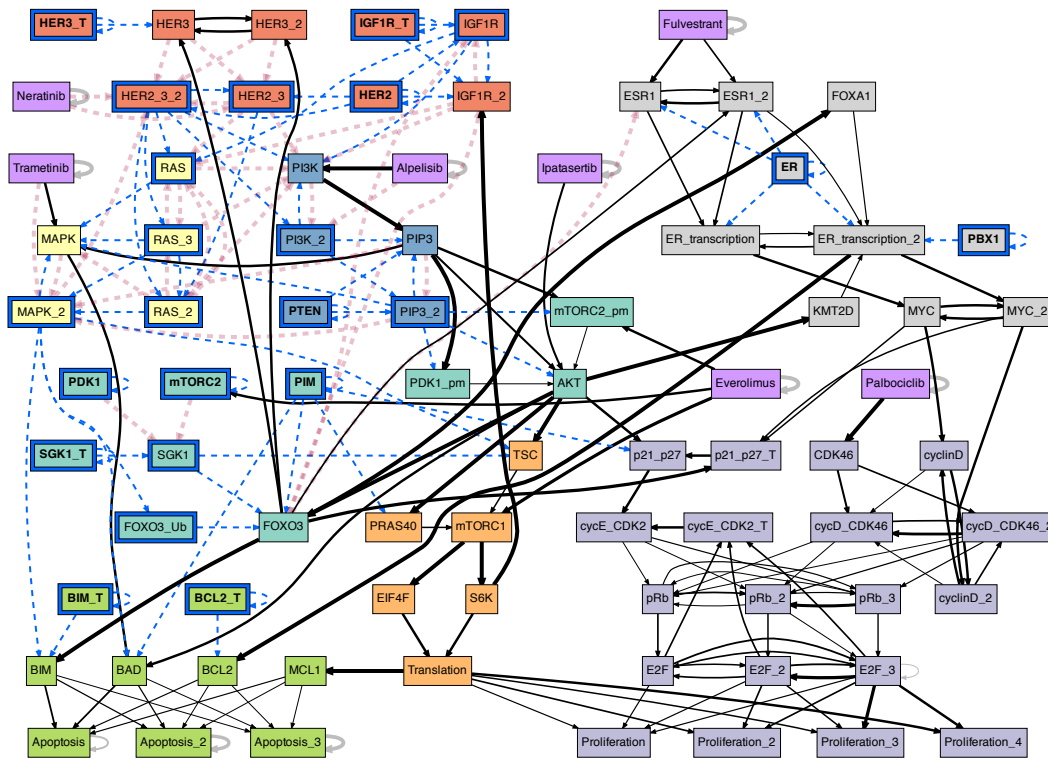

**Fig. S15. The conditional effective graph of the ER+ breast cancer BN model, conditioned on the ER+/Her2- cancer cell state baseline.** The baseline is defined by  $K = \{ER = ON, HER2 = OFF, HER3\_T = OFF, IGF1R\_T = ON, PBX1 = ON, PTEN = OFF, SGK1\_T = OFF, PIM1 = OFF, PDK1\_T = OFF, mTORC2 = OFF, BIM\_T = OFF, BCL2\_T = OFF\}$ . Variables in  $K$  (those initially pinned) are shown with a blue border and bold text; variables whose state becomes fixed (become constants), are shown with a blue border only. Edges that transmit a constant input state are denoted by a dashed blue color, while unresolved edges are denoted by black color with thickness proportional to their effectiveness,  $e_{ji}$ , with the fully redundant edges shown in dashed red. We can see that the ER + /Her2- cancer cell state baseline alone resolves a substantial portion of the possible dynamics in comparison to the non-conditioned effective graph (Fig. S10). Strikingly, *Neratinib* becomes redundant under this baseline initial condition, along with much of the HER pathway. Thus, *Neratinib* has no effect on this model under ER + /Her2- cancer cell state. Indeed, *Neratinib* is one of the drugs that were shown not to synergize with *Alpelisib* in (10); the others are *Ipasertib* and *Trametinib*. We can see that these three drugs only contribute to the same pathways that *Alpelisib* already acts on and become redundant when *Alpelisib* is present (see Fig. S16, as well as Figs. S19, S20, S22).

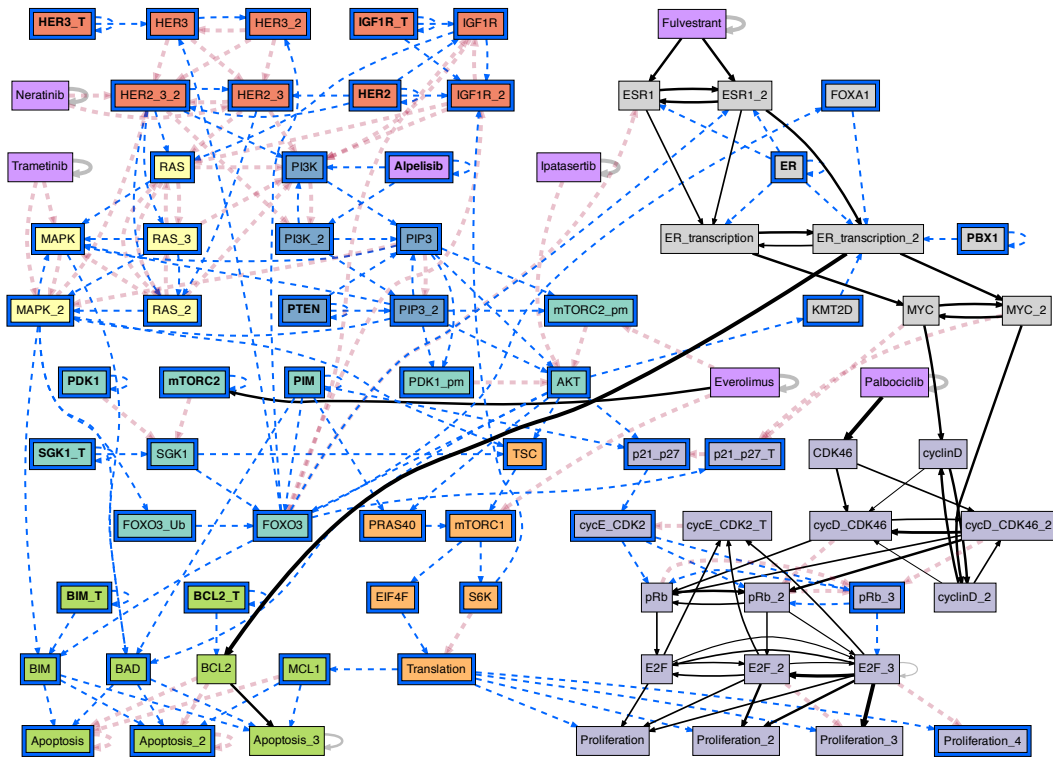

**Fig. S16. The conditional effective graph of the ER+ breast cancer BN model, conditioned on the ER+/Her2- cancer cell state baseline + Alpelisib=ON.**  $K$  is comprised of baseline nodes (see S15 caption) + {Alpelisib = ON}. Variables in  $K$  (those initially pinned) are shown with a blue border and bold text; variables whose state becomes fixed (become constants), are shown with a blue border only. Edges that transmit a constant input state are denoted by a dashed blue color, while unresolved edges are denoted by black color with thickness proportional to their effectiveness,  $e_{ji}$ , with the fully redundant edges shown in dashed red. We can see that Alpelisib with the ER + /Her2- cancer cell state baseline resolves a majority of the possible dynamics in comparison to the non-conditioned effective graph (Fig. S10); unresolved dynamics is circumscribed almost entirely to ER and proliferation pathways. Interestingly, Ipatasertib, Neratinib, and Trametinib become redundant under this initial condition: they have no effect on model dynamics under Alpelisib+ ER + /Her2- cancer cell state. The effective graph, however, reveals that the dynamics of this network is very robust to perturbation and hard to control because its subsystems are effectively decoupled. In particular, the baseline + Alpelisib=ON condition reveals that canalization works by preventing propagation of signals and cross-regulation. Indeed, most of the (non-drug) variables that have an impact on cancer apoptosis or proliferation under this condition (see Table 3 in (10)) have short paths to those target variables (at most 3 edges) in the effective graph. Exceptions in Table 3 in (10) are only a few nodes involved in the estrogen receptor (ER) transcription and signaling pathway such as the MYC oncogene and KMT2D epigenetic transcription activator. Interestingly, the conditional effective graph reveals that KMT2D becomes fixed under this condition, so any impact on proliferation can only occur by perturbing it out of its fixed state.



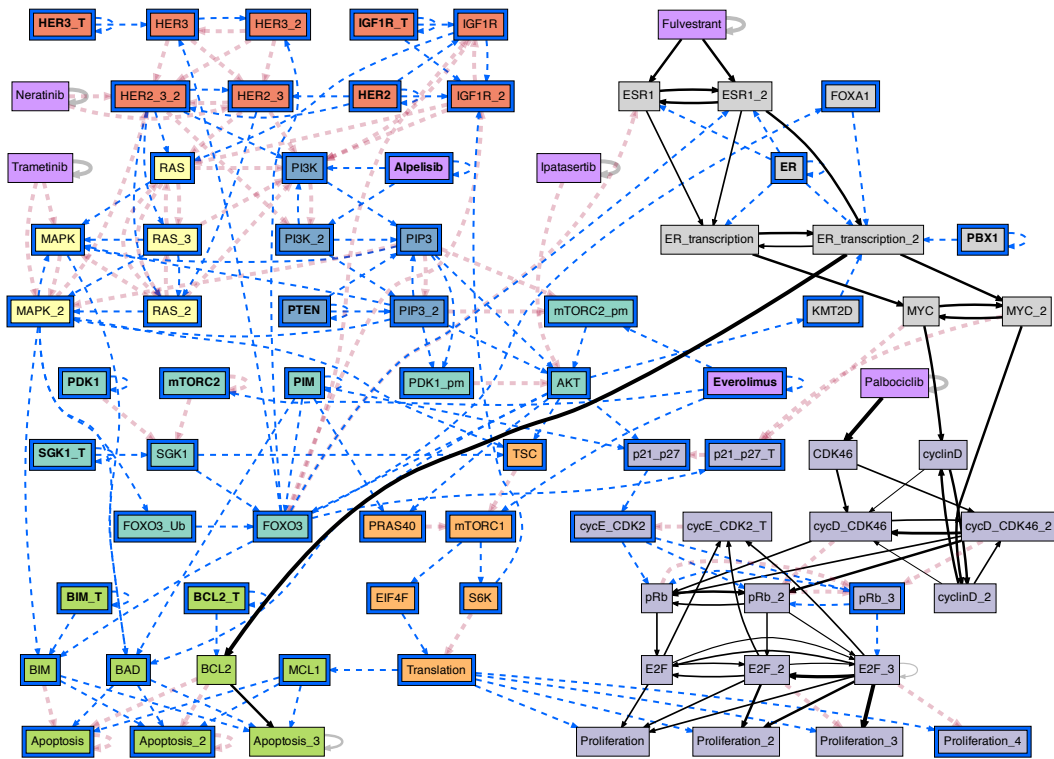

**Fig. S17.** The conditional effective graph of the ER+ breast cancer BN model, conditioned on the ER+/Her2- cancer cell state baseline + *Alpelisib*=*Everolimus*=ON.  $K$  is comprised of baseline nodes (see S15 caption) + {*Alpelisib* = ON, *Everolimus* = ON}. Variables in  $K$  (those initially pinned) are shown with a blue border and bold text; variables whose state becomes fixed (become constants), are shown with a blue border only. Edges that transmit a constant input state are denoted by a dashed blue color, while unresolved edges are denoted by black color with thickness proportional to their effectiveness,  $e_{ji}$ , with the fully redundant edges shown in dashed red. We can see that *Everolimus* hardly resolves any additional dynamics to what *Alpelisib* with the ER + /Her2- cancer cell state baseline already do (Fig. S16); only a few connections to *AKT* pathway.

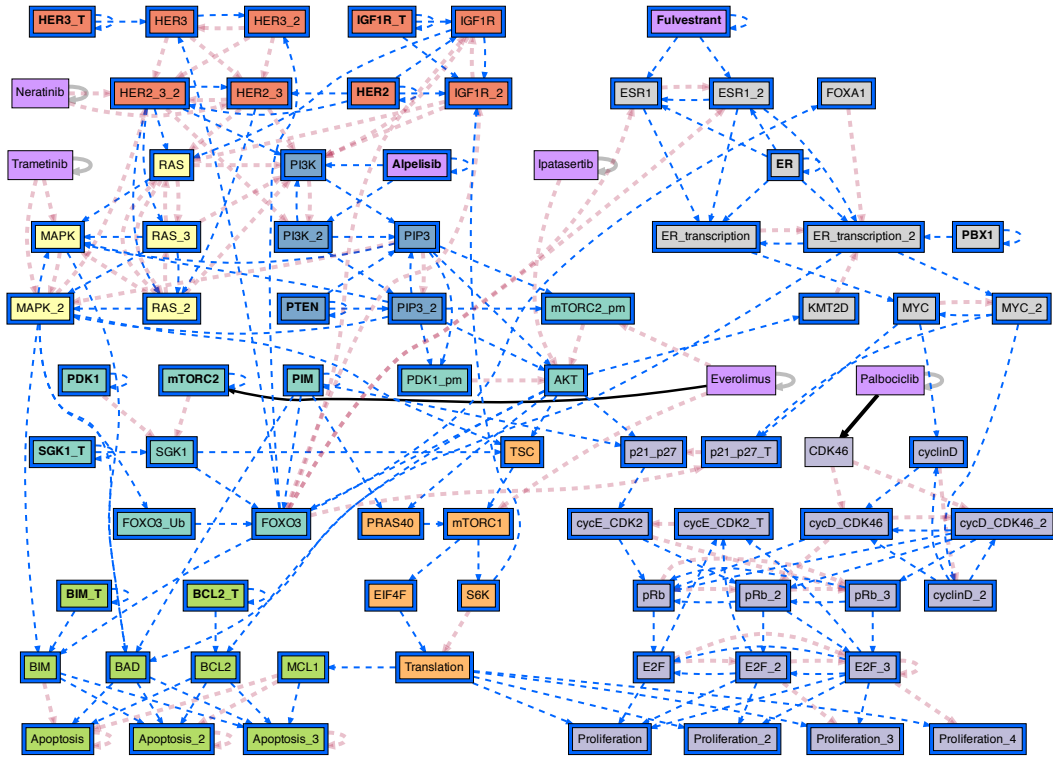

**Fig. S18.** The conditional effective graph of the ER+ breast cancer BN model, conditioned on the ER+/Her2- cancer cell state baseline + *Alpelisib*=*Fulvestrant*=ON.  $K$  is comprised of baseline nodes (see S15 caption) + {*Alpelisib* = ON, *Fulvestrant* = ON}. Variables in  $K$  (those initially pinned) are shown with a blue border and bold text; variables whose state becomes fixed (become constants), are shown with a blue border only. Edges that transmit a constant input state are denoted by a dashed blue color, while unresolved edges are denoted by black color with thickness proportional to their effectiveness,  $e_{ji}$ , with the fully redundant edges shown in dashed red. We can see that *Fulvestrant* resolves almost the remaining dynamics that was not yet resolved by *Alpelisib* with the ER+ /Her2- cancer cell state baseline (Fig. S16). In particular, every apoptosis and proliferation node gets resolved. This combination strategy is the most powerful, rendering all other drugs redundant, except for the influence *Everolimus* has in *AKT* pathway, which does not propagate anyway.

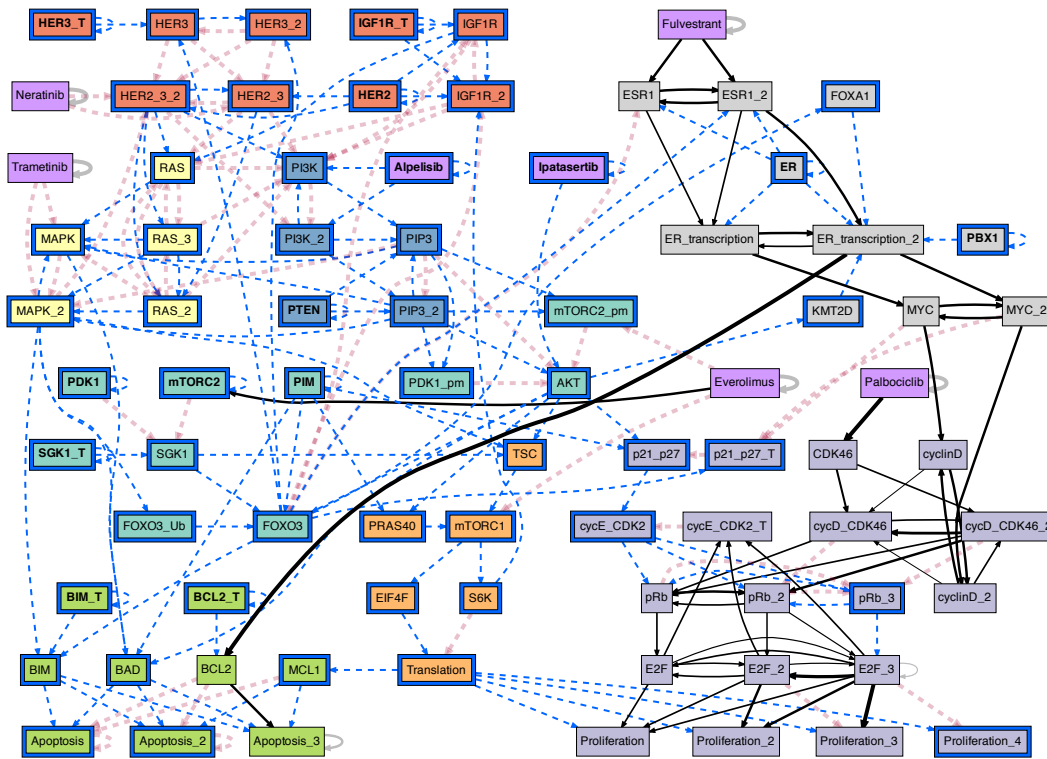

**Fig. S19. The conditional effective graph of the ER+ breast cancer BN model, conditioned on the ER+/Her2- cancer cell state baseline + Alpelisib=Ipatasertib=ON.**  $K$  is comprised of baseline nodes (see S15 caption) + {Alpelisib = ON, Ipatasertib = ON}. Variables in  $K$  (those initially pinned) are shown with a blue border and bold text; variables whose state becomes fixed (become constants), are shown with a blue border only. Edges that transmit a constant input state are denoted by a dashed blue color, while unresolved edges are denoted by black color with thickness proportional to their effectiveness,  $e_{ji}$ , with the fully redundant edges shown in dashed red. We can see that Ipatasertib does resolve any additional dynamics to what Alpelisib with the ER + /Her2- cancer cell state baseline already do (Fig. S16).

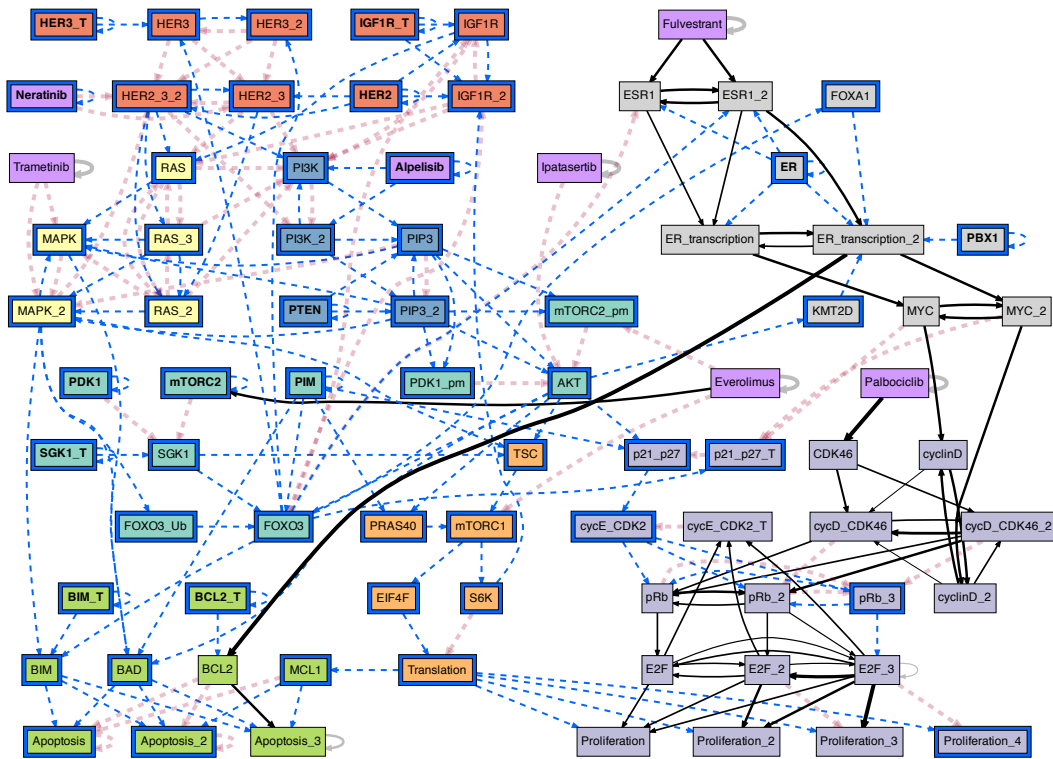

**Fig. S20.** The conditional effective graph of the ER+ breast cancer BN model, conditioned on the ER+/Her2- cancer cell state baseline + *Alpelisib=ON*, *Neratinib=ON*.  $K$  is comprised of baseline nodes (see S15 caption) + {*Alpelisib* = ON, *Neratinib* = ON}. Variables in  $K$  (those initially pinned) are shown with a blue border and bold text; variables whose state becomes fixed (become constants), are shown with a blue border only. Edges that transmit a constant input state are denoted by a dashed blue color, while unresolved edges are denoted by black color with thickness proportional to their effectiveness,  $e_{ji}$ , with the fully redundant edges shown in dashed red. We can see that *Neratinib* does resolve any additional dynamics to what *Alpelisib* with the ER+ /Her2- cancer cell state baseline already do (Fig. S16).

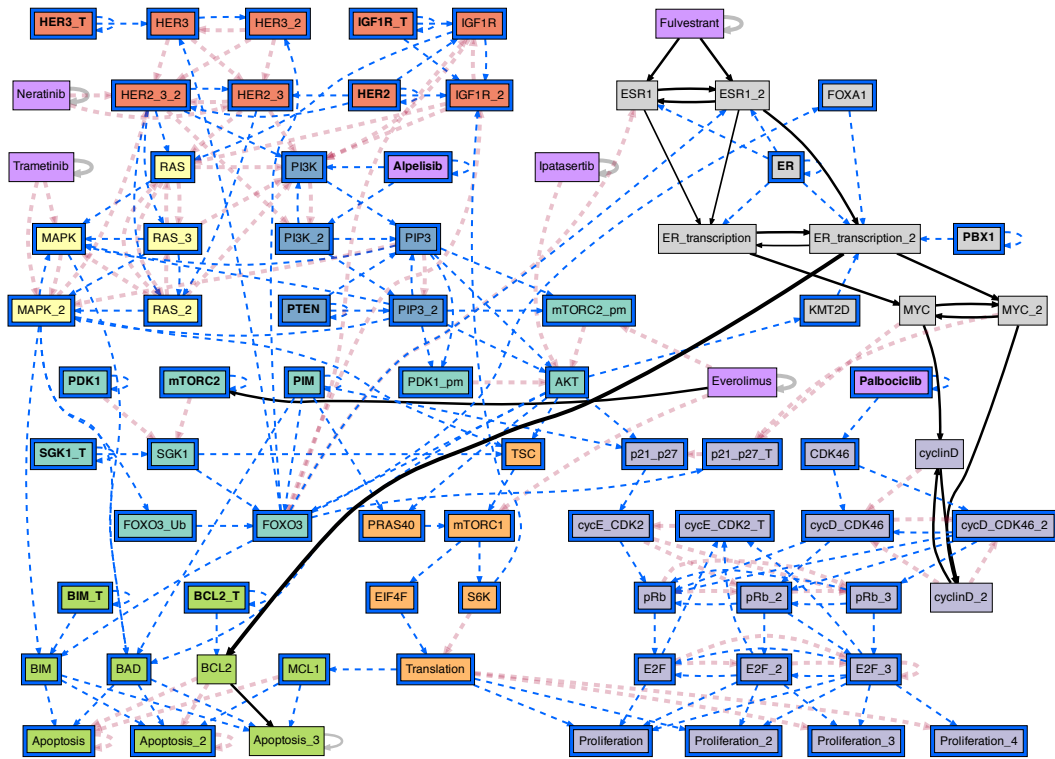

**Fig. S21.** The conditional effective graph of the ER+ breast cancer BN model, conditioned on the ER+/Her2- cancer cell state baseline + Alpelisib=Palbociclib=ON.  $K$  is comprised of baseline nodes (see S15 caption) + {Alpelisib = ON, Palbociclib = ON}. Variables in  $K$  (those initially pinned) are shown with a blue border and bold text; variables whose state becomes fixed (become constants), are shown with a blue border only. Edges that transmit a constant input state are denoted by a dashed blue color, while unresolved edges are denoted by black color with thickness proportional to their effectiveness,  $e_{ji}$ , with the fully redundant edges shown in dashed red. We can see that Palbociclib resolves the proliferation pathway in addition to the dynamics that Alpelisib with the ER+ /Her2- cancer cell state baseline resolved on their own (Fig. S16). In particular, every proliferation node gets resolved, which means that Palbociclib displays useful synergy with Alpelisib. However, unlike the case of Fulvestrant, Palbociclib has no effect on apoptosis in this model for the ER+ /Her2- cancer cell state baseline.

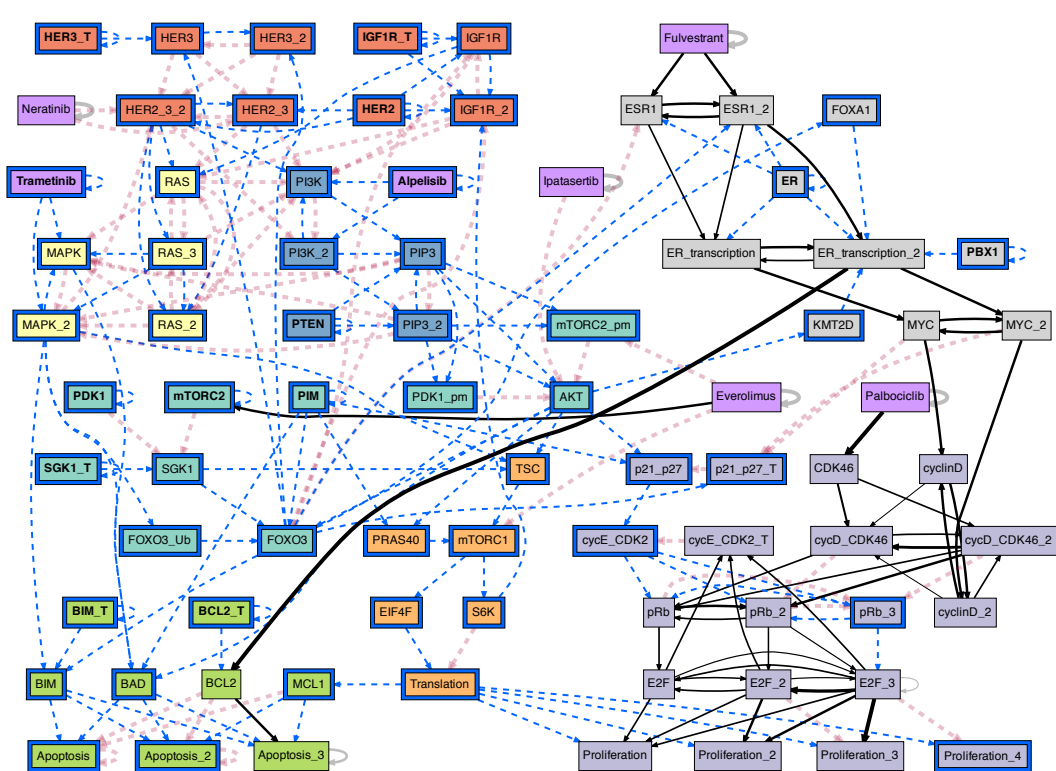

**Fig. S22. The conditional effective graph of the ER+ breast cancer BN model, conditioned on the ER+/Her2- cancer cell state baseline + *Alpelisib*=*Trametinib*=ON.**  $K$  is comprised of baseline nodes (see S15 caption) + {*Alpelisib* = ON, *Trametinib* = ON}. Variables in  $K$  (those initially pinned) are shown with a blue border and bold text; variables whose state becomes fixed (become constants), are shown with a blue border only. Edges that transmit a constant input state are denoted by a dashed blue color, while unresolved edges are denoted by black color with thickness proportional to their effectiveness,  $e_{ji}$ , with the fully redundant edges shown in dashed red. We can see that *Trametinib* does resolve any additional dynamics to what *Alpelisib* with the ER + /Her2- cancer cell state baseline already do (Fig. S16).

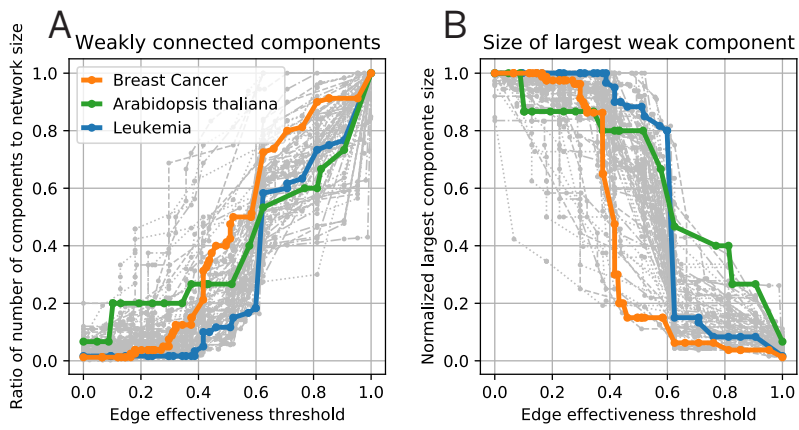

**Fig. S23. Weakly connected components of threshold effective graphs reveal dynamical modules.** **A** Ratio of the number of weakly connected components to network size. **B** Size of the largest weakly connected component, normalized by network size. In both graphs, the *ER+* breast cancer (orange), leukemia (blue), and *Arabidopsis thaliana* (blue) networks are highlighted.

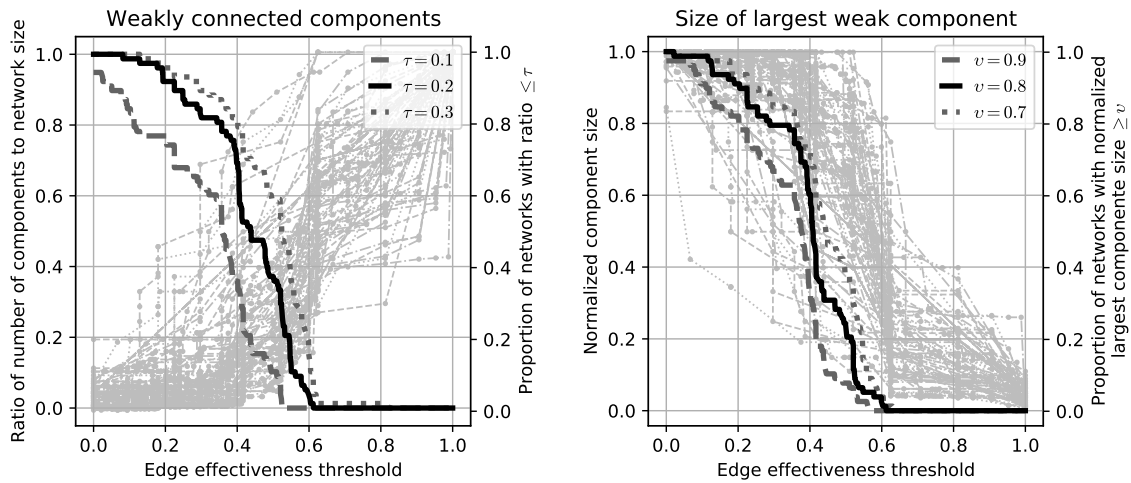

**Fig. S24. Analysis of weakly connected components per edge effectiveness threshold for all Cell Collective models.** Gray thin lines denote each network in dataset, thick lines denote overall statistics per legend. **Left.** Ratio of number of weakly connected components to network size (left vertical axis) for a given edge effectiveness threshold (horizontal axis); ratio is 1 when every node in network is a separate component, and very small when there is a single weakly connected component. Also shown are three statistics for the proportion of networks with ratio  $\leq \tau$  (right vertical axis); e.g. for  $\tau = 0.2$ , black thick line denotes the proportion of networks whose ratio of number of weakly connected components to network size is smaller than 0.2 at a given edge effectiveness threshold. We can see, for instance, that for an edge effectiveness of 0.2, more than 90% of the networks have a small number of weakly connected components, specifically, less than  $\tau = 20\%$  of the network size; for edge effectiveness larger than 0.4, on the other hand, most networks quickly break into many components, and for edge effectiveness larger than 0.6, no networks have a ratio of number of components to network size smaller than 20% (or even 30%, per dotted thick line). **Right.** Size of largest weakly connected component relative to network size (left vertical axis) for a given edge effectiveness threshold (horizontal axis); ratio is 1 when there is a single weakly connected component, and very small when every node is its separate component. Also shown are three statistics for the proportion of networks with largest normalized component size  $\geq v$  (right vertical axis); e.g. for  $v = 0.8$ , black thick line denotes the proportion of networks whose largest normalized component size is larger than 0.8 at a given edge effectiveness threshold. We can see, for instance, that for an edge effectiveness of 0.2, about 90% of the networks have a largest weakly connected component comprised of at least  $v = 80\%$  of the network; for edge effectiveness larger than 0.4, on the other hand, most networks quickly lose a substantial largest weakly connected component, and for edge effectiveness larger than 0.6, no networks have a largest weakly connected component comprised of at least 80% of the network (or even 70%, per dotted thick line)
